# Supplementary material
Source: PubMed Central journal article supplement (PMC4924617)
Supplement: NIHMS796825-supplement-SOM.pdf [file NIHMS796825-supplement-SOM.pdf]

## Supporting Online Material for

### Complete biosynthesis of opioids in yeast

Stephanie Galanie<sup>#</sup>, Kate Thodey<sup>^</sup>, Isis J. Trenchard<sup>^</sup>, Maria Filsinger Interrante<sup>^</sup>,  
Christina D. Smolke<sup>^,\*</sup>

<sup>#</sup>Department of Chemistry, Stanford University, Stanford, California 94305, USA

<sup>^</sup>Department of Bioengineering, 443 Via Ortega, MC 4245, Stanford University,  
Stanford, California 94305, USA

\*To whom correspondence should be addressed. E-mail: [csmolke@stanford.edu](mailto:csmolke@stanford.edu)

**This PDF file includes:**

Materials and Methods

Tables S1 to S8

Figs. S1 to S8

References

## Materials and Methods

### Chemicals, media, and strain cultivation

Difco yeast nitrogen base without amino acids and ammonium sulfate (YNB), Bacto peptone, Bacto yeast extract, Luria Broth (LB), LB agar, dextrose, and galactose were obtained from Becton, Dickinson and Company (BD). Kanamycin monosulfate, geneticin sulfate (G418), ampicillin, spectinomycin, amino acids, uracil, adenine hemisulfate, tris(hydroxymethyl)aminomethane hydrochloride, polysorbate 20 (Tween-20), ascorbic acid, and LC-MS grade methanol were obtained from EMD chemicals. LC-MS grade formic acid, acetonitrile, isopropanol, and *n*-hexane were obtained from Thermo Fisher Scientific. 1-(3,4-dihydroxybenzyl)-1,2,3,4-tetrahydroisoquinoline-6,7-diol hydrobromide (tetrahydropapaveroline or norlaudanosoline, NL) was obtained from Santa Cruz Biotechnology. Phleomycin was purchased from InvivoGen. Amberlite XAD-4 resin, LC-MS grade diethylamine, and hygromycin B were purchased from Sigma. The authentic chemical standards (*S*)-reticuline perchlorate and salutaridine were obtained from Specs; (*R*)-reticuline and 1,2-dehydroreticulinium iodide from Toronto Research Chemicals; and 3,4-dihydroxy-L-phenylalanine (L-DOPA), dopamine hydrochloride, thebaine, and hydrocodone bitartrate from Sigma.

*E. coli* strains were selected on LB agar plates with 50 mg/L kanamycin, 50 mg/L ampicillin, or 100 mg/L spectinomycin and grown in LB liquid media with the appropriate antibiotic. Yeast 10x drop out (DO) supplement was prepared as synthetic complete supplement with the desired selection component omitted. *S. cerevisiae* strains were selected on YNB-DO (0.17% yeast nitrogen base, 0.5% ammonium sulfate, 2% dextrose, and 1x DO) agar or on YPAD (1% yeast extract, 2% peptone, 80 mg/L adenine

hemisulfate, and 2% dextrose) agar with 200 mg/L G418, 200 mg/L hygromycin B, or 10 mg/L phleomycin. Yeast were grown in selective YNB-DO media or in YPAD media.

### Strains and plasmids

*E. coli* strain TOP10 (Life Technologies) was used for cloning and amplification of plasmids. Plasmids were recovered using Econospin columns (Epoch Life Sciences) according to manufacturer's instructions. *S. cerevisiae* strain W303 $\alpha$  was used as the base strain for engineered strains in Figs. 2-3 and figs. S7-8. *S. cerevisiae* strain CEN.PK2-1D $\alpha$  was used as the base strain for reticuline-producing platform strains and strains in Figs. 1 and 4 and fig. S3 (table S3). Oligonucleotide primer sequences are provided in table S7. Oligonucleotides were synthesized by Integrated DNA Technologies (IDT) or the Stanford Protein and Nucleic Acid Facility. Heterologous gene sequences were cloned from previously published plasmids or downloaded from Genbank, the 1000 Plants Project, or PhytoMetaSyn, yeast codon-optimized (35), and synthesized by Life Technologies or IDT (table S1 and S8). PfuUltraII Fusion HS DNA polymerase (Agilent Technologies) for <3 kb fragments, Platinum Taq PCR SuperMix (Life Technologies) for site-directed mutagenesis, and Expand High Fidelity PCR system for >3 kb fragments (Roche Diagnostics) were used for PCR amplifications according to manufacturer's instructions. PCR products were purified by agarose gel extraction with Zymoclean gel DNA recovery kit (Zymo Research) according to manufacturer's instructions. Restriction enzymes, T4 DNA ligase, and deoxynucleotides were purchased from New England Biolabs.

Strains and plasmids used or constructed in this work are described in table S3. Plasmids pCS3300-3305 and pCS3313-3340 were constructed by amplifying the insert with either a CACC 5' overhang or 5' and 3' BP sequences and using the pENTR/D-TOPO cloning kit or Gateway BP clonase II and pDONR221 (Life Technologies), respectively, to create a Gateway entry vector. The insert was then cloned into a pAG destination vector (pAG416GPD-ccdB, #14148 or pAG416GPD-ccdB-HA, #14244) obtained from Addgene via Susan Lindquist (43) using Gateway LR clonase II (Life Technologies). Constructs were verified by sequencing through the inserted region (Elim Biopharmaceuticals). Plasmids were introduced into yeast by the lithium acetate/salmon sperm carrier DNA/polyethylene glycol transformation method (44).

Holding vectors (pCS2803, 3028, 3030, 3040, 3041, 3138, 3271-3273, 3289-3298, and 3343-3350) were constructed by amplifying the backbone, including the promoter and terminator, and assembling with the insert via Gibson cloning (45). Expression cassettes were amplified using primers with 15 bp overhangs for gap repair in yeast. 100 ng each of the PCR products and linearized pYES1L (Life Technologies) were introduced by electroporation into the desired yeast background strain to make constructs pCS3308-3311 (13, 46). Plasmids were isolated from yeast and amplified in *E. coli* as previously described.

Yeast chromosomal modifications were made by the microhomology gene disruption method and DNA assembler (47, 48). Expression cassettes were amplified using primers with 15-40 bp overhangs for gap repair in yeast. Each assembly was flanked by an integration homology region of 50-500 base pairs. We selected chromosomal regions from which we expected no growth defect and active expression as

integration loci (23-25). 100-300 ng of each of the PCR products were introduced by electroporation into the desired yeast background strain to make strains CSY1055-1061, CSY1064, and CSY1065. All modifications were verified by yeast colony PCR as previously described, with the exclusion of gelatin from buffers (49).

*Agrobacterium tumefaciens* strain GV3101 (Inzé laboratory, Ghent University) and 4-6 week old *Nicotiana benthamiana* plants were provided by the Sattely laboratory (Stanford University), and plant expression vectors pEAQ-HT and pEAQ-HT-GFP (pCS3352) (50) were provided by the Lomonossoff laboratory (John Innes Centre). Wild-type *P. somniferum* SalSyn was cloned from GFC55 in pVL1392 (51), provided by the Kutchan laboratory (Donald Danforth Plant Center). Please note that opiate-producing yeast strains can only be shared with laboratories that possess appropriate DEA registration and permits.

#### Yeast cultivation assays for benzyloquinoline alkaloid production

Single colonies of freshly transformed or freshly streaked yeast strains were inoculated into 3 mL in 16 x 150 mm glass culture tubes or 0.5 mL in a 96-well plate of the appropriate YNB-DO media and grown for 17 h at 30 °C in a shaking incubator at 260 rpm. Overnight cultures were back-diluted 1:20 into assay media composed of YNB-SC or DO media. Where indicated, media lacked ammonium sulfate and/or was supplemented with 10 mM ascorbic acid, 50 mM 2-oxoglutarate, and/or substrate to a total volume of 500 µL in culture tubes or plates. Ascorbic acid is a general antioxidant and was previously reported to stabilize the catecholic molecule norlaudanosoline in *E. coli* cultures (52) and BH<sub>4</sub>, the tyrosine hydroxylase cofactor in this engineered pathway

(18, 53). 4-HPAA is produced by catabolism of L-tyrosine for nitrogen assimilation via the Ehrlich pathway. Therefore, limiting the nitrogen source ammonium sulfate in the media upregulates expression of endogenous yeast genes associated with amino acid catabolism and 4-HPAA production (54). Thus, both of these changes to the media are directed toward increasing precursor supply to the pathway. 2-Oxoglutarate is a co-substrate for T6ODM (55).

Cultures were grown for 72-120 h and then pelleted by 5 min centrifugation. The supernatant was analyzed by high performance liquid chromatography-tandem mass spectrometry with multiple reaction monitoring (LC-MS/MS MRM).

#### Analysis of benzyloquinoline alkaloid production by high-performance liquid chromatography-tandem mass spectrometry (LC-MS/MS)

Yeast growth media supernatant was analyzed by LC-MS/MS using an Agilent 1260 infinity binary pump HPLC and Agilent 6420 triple quadrupole mass spectrometer with an electrospray ionization source. Mobile phase A was water with 0.1% formic acid (FA), phase B was acetonitrile with 0.1% FA, and the flow rate was 0.4 mL/min. For analysis of L-DOPA and dopamine (method A), chromatography was performed with a Pursuit PFP column (2.1 x 150 mm, 3  $\mu$ m, Agilent Technologies), 15  $\mu$ L injection volume, and the following method: 2% B for 0.5 min, 2-60% B for 1 min, 60% B for 2.5 min, and re-equilibrate for 3 min. For all other compounds, 5  $\mu$ L samples were injected on a Zorbax Eclipse Plus C18 column (2.1 x 50 mm, 1.8  $\mu$ m, Agilent Technologies) and separated with one of the following methods: for norlaudanosoline feeding assays (method B), 10-35% B for 4 min, 35-98% B for 0.5 min, held at 98% B for 1 min,

returned to 2% B over 0.6 min, then re-equilibrate with 10% B for 2 min; for *de novo* thebaine production assays (method C), 3% B for 0.1 min, 3-35% B for 4.9 min, 35-98% B for 1 min, hold 98% B for 1 min, re-equilibrate with 3% B for 2 min; and for analysis of opioid drugs (method D), 5-35% B for 5.5 min, 35-90% B for 0.5 min, hold 90% B for 1 min, decrease to 5% B over 0.5 min, the hold for 2 min re-equilibration. The LC eluent was directed to the MS for 1-5 min with ESI source gas temperature 350 °C, gas flow of 11 L/min, nebulizer pressure 40 PSI, capillary voltage of 3500 V, and Delta EMV (+) of 200. Compound identity was confirmed by comparing the retention time and either product ion spectrum or multiple MRM transitions to an authentic standard when available or to published mass fragmentation spectra (13, 27, 56-58) using MassHunter Qualitative Analysis v. B.06 (Agilent Technologies). For quantification, the MS was used in MRM mode to monitor the transitions in table S2. These transitions were determined using the MassHunter Optimizer software with standards when available or with samples with high abundance and confirmed with literature. The data was analyzed using MassHunter Quantitative Analysis v. B.07 for QQQ (Agilent Technologies) to identify and integrate peaks with the correct ratio of qualifying and quantifying mass transitions and correct retention times (table S2). Quantifier MRM peak areas were compared to a calibration curve of external standard peak areas to determine concentration. For compound characterization the MS was either used in MRM mode with a constant collision energy to monitor four to eight transitions and generate an MRM spectrum or used in product ion scan mode to detect all fragments resulting from a specified collision energy to generate a product ion spectrum.

For chiral characterization in norlaudanosoline-fed experiments, reticuline was

concentrated from yeast media by pelleting 12.5 mL yeast culture and adding 30 mg XAD-4 resin per mL supernatant, incubating on a rotator overnight at room temperature, and eluting with 100  $\mu$ L methanol per mL supernatant. For chiral characterization in *de novo* experiments, reticuline was concentrated from yeast media by pelleting 500 mL yeast culture, adjusting the pH to 8 with  $\text{NH}_4\text{OH}$ , and extracting four times with 100 mL dichloromethane. Dichloromethane was removed under vacuum and the residue was resuspended in 5 mL water with 0.1% formic acid. Both concentrates were fractionated by reverse-phase HPLC (Pursuit XRs-C18, 50 mm  $\times$  10 mm, 5  $\mu$ m) with isocratic 15% methanol with 0.1% formic acid over 6.5 min with a flow rate of 5 mL/min and injection volume of 40-60  $\mu$ L. Peak-based fractions were collected at approximately 4.5 min. Fractions were pooled, freeze-dried, and resuspended in 125  $\mu$ L isopropanol for fed experiments or 300  $\mu$ L for *de novo* experiments. Depending on concentration, 1-5  $\mu$ L were injected onto a chiral column (Phenomenex Lux cellulose-1, 150 mm  $\times$  2 mm, 3  $\mu$ m) and separated with isocratic 72% N-hexane, 28% isopropanol, 0.1% diethylamine with a flow rate of 0.3 mL/min and detection by MS and 250 nm UV. MS detection was performed with an Agilent 6320 Ion Trap mass spectrometer with ESI source gas temperature 350  $^\circ\text{C}$ , gas flow of 10 L/min, nebulizer pressure 40 PSI and isolation of  $m/z$  330.1 with width 1.0. The retention time of reticuline peaks was compared to that of authentic (*S*)-reticuline and (*R*)-reticuline standards. Individual chromatograms from chiral analysis were smoothed using a 7-point boxcar moving average algorithm (<http://terpconnect.umd.edu/~toh/spectrum/smoothing.xls>).



### Identification of reticuline epimerase and enzyme variants from transcriptomes

A previously published codeinone reductase (COR) virus-induced gene silencing (VIGS) construct (31) that resulted in reticuline accumulation was used to query the *P. bracteatum*, *P. setigerum*, *P. somniferum*, *P. rhoeas* 1000 Plants Project (32) and *P. bracteatum* PhytoMetaSyn (33, 34) transcriptomes and all deposited sequences in Genbank belonging to *Papaveraceae* using blastn. The hits with  $E < 0.1$  were in turn used as blastn queries of all Genbank sequences belonging to taxid: Ranunculales. The best reciprocal blast hit for each transcriptome hit was reviewed to determine encoded conserved protein domains. Once one DRS-DRR fusion sequence was observed as a hit, that sequence (Pbr.89405) was translated and the amino acid sequence was used as the query for a second search of both databases with tblastn. A phylogenetic tree of the sequences identified from the initial database search, including those identified as DRS-DRR fusion enzymes, is provided in Fig. 2B. A phylogenetic tree of the additional DRS-DRR variants identified in the second database search is provided in fig. S6. Phylogenetic trees were generated using ClustalX bootstrap NJ tree with 1000 trials, and visualized with FigTree. The sequences of the synthesized codon-optimized variants tested (Pbr.89405, Pbr. 12180, Pbr.4328, and Pso.2062398) are provided in table S8.

The SalSyn variant from *P. bracteatum* (PbSalSyn) was identified by querying the 1000 Plants Project *P. bracteatum* transcriptome with tblastn using the protein sequence for PsSalSyn and identifying the best hit by reciprocal blast. The coding sequence was determined from transcriptome sequence TMWO-2131695, codon-optimized for yeast, synthesized, and cloned to make pCS3335.

## Western blot analysis

Western blot analysis of yeast expressing C-terminally human influenza hemagglutinin epitope-tagged (3xHA) salutaridine synthase variants (pCS3313-3321) was performed as previously described (59) with Novex NuPAGE lithium dodecyl sulfate (LDS) sample buffer (Life Technologies) in place of Laemmli buffer. Plant samples were prepared from 4-6 week old tobacco (*Nicotiana benthamiana*) leaves 96 h after infusion with *A. tumefaciens* strain GV3101 with a GFP expressing plasmid (pCS3352) or PsSalSyn-3xHA plasmid (pCS3312). Three leaves were homogenized to powder under liquid nitrogen with mortar and pestle and resuspended in 1 mL 30 mM potassium phosphate buffer, pH 8. A volume of this crude lysate equivalent to 80 µg supernatant protein (determined by Bradford assay) was added to 12.5 µL 4x LDS buffer and adjusted with water to 50 µL final volume. Novex sharp pre-stained protein standard and 12 µL samples, equivalent to 0.6 mg yeast wet weight (~20 µg protein) or 20 µg plant supernatant protein, were loaded on a NuPage Novex 4-12% Bis-Tris protein gel and run with MOPS SDS running buffer (Life Technologies) at 150 V for 50-90 min. Semi-dry transfer to a nitrocellulose membrane was performed at 15 V for 15 min with transfer buffer (Life Technologies). The membrane was blocked with 5% BSA and probed overnight at 4 °C with anti-HA horseradish peroxidase (HRP) (ab1188, Abcam) (1:5,000). Chemiluminescence was induced by SuperSignal West Pico substrate (Pierce) and images were acquired by a G:Box Chemi XT4 imaging system (Syngene).

## **Supplementary Tables**

**Table S1.** Expression cassettes used in this study.

| Module | Plasmid template | Cassette                                                                                             | Source organism                                | GenBank ID (protein) | DNA coding sequence reference or entry in Table S8 |
|--------|------------------|------------------------------------------------------------------------------------------------------|------------------------------------------------|----------------------|----------------------------------------------------|
| 1      | pCS3028          | <i>ARO4</i> <sup>Q766K</sup> (with <i>ARO4</i> native promoter and terminator)                       | <i>S. cerevisiae</i>                           | AJQ16674.1           | (60)                                               |
| 1      | pCS3030          | <i>ARO7</i> <sup>T226I</sup> (with <i>ARO7</i> native promoter and terminator)                       | <i>S. cerevisiae</i>                           | NP_015385            | (61)                                               |
| 1      | pCS2922          | <i>hphNTI</i> selection marker (Hyg <sup>R</sup> ) flanked by loxP                                   | <i>K. pneumoniae</i>                           | AEG42736             | (62)                                               |
| 1      | pCS784           | <i>P<sub>TEF1</sub>-ARO10-T<sub>CYC1</sub></i>                                                       | <i>S. cerevisiae</i>                           | NP_010668            | native                                             |
| 1      | pCS3289          | <i>P<sub>TDH3</sub>-TKL1-T<sub>ADH1</sub></i>                                                        | <i>S. cerevisiae</i>                           | NP_015399            | native                                             |
| 2      | pCS3040          | <i>P<sub>TPI1</sub>-yRnSpr-T<sub>STE2</sub>, P<sub>TEF1</sub>-yRnPts-T<sub>CYC1</sub></i>            | <i>R. norvegicus</i>                           | AAA42130, AAH59140   | (18)                                               |
| 2      | pCS270           | KanMX (G418 <sup>R</sup> ) selection marker flanked by loxP                                          | <i>Tn 903</i>                                  | AF298793             | (63)                                               |
| 2      | pCS3041          | <i>P<sub>TDH3</sub>-yRnQdpr-T<sub>ADH1</sub>, P<sub>PGK1</sub>-yRnPcbd1-T<sub>PHO5</sub></i>         | <i>R. norvegicus</i>                           | P11348, NP_001007602 | (18)                                               |
| 3, 5   | pCS3290          | <i>P<sub>TDH3</sub>-RnTh<sup>WR</sup>-T<sub>ADH1</sub></i>                                           | <i>R. norvegicus</i>                           | NP_036872            | (64)                                               |
| 3      | pCS3291          | <i>P<sub>TPI1</sub>-yPpddc-T<sub>STE2</sub></i>                                                      | <i>P. putida</i>                               | AAN68161             | (18)                                               |
| 3      | pCS271           | <i>HIS5</i> selection marker flanked by loxP                                                         | <i>S. pombe</i>                                | AF298790             | (63)                                               |
| 3      | pCS3292          | <i>P<sub>TEF1</sub>-yRnDhfr-T<sub>CYC1</sub></i>                                                     | <i>R. norvegicus</i>                           | AF318150             | (18)                                               |
| 3      | pCS3293          | <i>P<sub>PGK1</sub>-yCjNCS-T<sub>PHO5</sub></i>                                                      | <i>C. japonica</i>                             | BAF45338             | (18)                                               |
| 4, 5   | pCS3294          | <i>P<sub>PYK1</sub>-PsCNMT-T<sub>MFa1</sub></i>                                                      | <i>P. somniferum</i>                           |                      | (11)                                               |
| 4      | pCS3138          | <i>P<sub>PGK1</sub>-Ps6OMT-T<sub>PHO5</sub></i>                                                      | <i>P. somniferum</i>                           | AAP45315             | (11)                                               |
| 4      | pCS3295          | <i>P<sub>TDH3</sub>-yEcNMCH-T<sub>ADH1</sub></i>                                                     | <i>E. californica</i>                          | AF014801             | (18)                                               |
| 4      | pCS274           | <i>LEU2</i> selection marker flanked by loxP                                                         | <i>K. lactis</i>                               | AF298792             | (63)                                               |
| 4      | pCS3296          | <i>P<sub>TEF1</sub>-yPsCPR-T<sub>CYC1</sub></i>                                                      | <i>P. somniferum</i>                           | AAC05021             | (18)                                               |
| 4      | pCS2803          | <i>P<sub>TPI1</sub>-yPs4'OMT-T<sub>STE2</sub></i>                                                    | <i>P. somniferum</i>                           | AAP45314             | (18)                                               |
| 5      | pCS3298          | <i>P<sub>TEF1</sub>-Ps4'OMT-T<sub>CYC1</sub></i>                                                     | <i>P. somniferum</i>                           | AAP45314             | (11)                                               |
| 5      | pCS272           | Ble (Phleo <sup>R</sup> ) selection marker flanked by loxP                                           | <i>Tn 5</i>                                    | AF298794             | (63)                                               |
| 6      | pCS273           | <i>URA3</i> selection marker flanked by loxP                                                         | <i>K. lactis</i>                               | AF298788             | (63)                                               |
| 6      | pCS3273          | <i>P<sub>TDH3</sub>-yEcCFS<sup>1-83</sup>-yPbSalSyn<sup>92-</sup><sub>504</sub>-T<sub>ADH1</sub></i> | <i>E. californica</i> and <i>P. bracteatum</i> | B5UAQ8.1 and no ID   | (14) and S8                                        |
| 6      | pCS3272          | <i>P<sub>PGK1</sub>-yPsSalAT-T<sub>PHO5</sub></i>                                                    | <i>P. somniferum</i>                           | Q94FT4.1             | (65)                                               |
| 6      | pCS3271          | <i>P<sub>TPI1</sub>-yPbSalR-T<sub>STE2</sub></i>                                                     | <i>P. bracteatum</i>                           | A4UHT7.1             | (65)                                               |
| 6      | pCS3300          | <i>P<sub>HXT7</sub>-yPbDRS-DRR (Pbr.89405)-T<sub>CYC1</sub></i>                                      | <i>P. bracteatum</i>                           | no ID                | S8                                                 |
| 7      | pCS2656          | <i>P<sub>TDH3</sub>-yPsT6ODM-T<sub>ADH1</sub></i>                                                    | <i>P. somniferum</i>                           | ADD85329.1           | (13)                                               |
| 7      | pCS2663          | <i>P<sub>PGK1</sub>-yPpmorB-T<sub>PHO5</sub></i>                                                     | <i>P. putida</i>                               | AAC43569.1           | (13)                                               |
| n/a    | pCS3343          | <i>P<sub>TPI1</sub>-yPsSalR<sup>F104A</sup>-T<sub>STE2</sub></i>                                     | <i>P. somniferum</i>                           | 3O26_A               | (36, 65)                                           |
| n/a    | pCS3344          | <i>P<sub>TPI1</sub>-yPsSalR<sup>I275A</sup>-T<sub>STE2</sub></i>                                     | <i>P. somniferum</i>                           | 3O26_A               | (36, 65)                                           |
| n/a    | pCS3345          | <i>P<sub>TPI1</sub>-yPbSalR<sup>F104A</sup>-T<sub>STE2</sub></i>                                     | <i>P. bracteatum</i>                           | A4UHT7.1             | (36, 65)                                           |
| n/a    | pCS3346          | <i>P<sub>TPI1</sub>-yPbSalR<sup>I275A</sup>-T<sub>STE2</sub></i>                                     | <i>P. bracteatum</i>                           | A4UHT7.1             | (36, 65)                                           |

|     |         |                                    |                      |          |                           |
|-----|---------|------------------------------------|----------------------|----------|---------------------------|
| n/a | pCS3347 | $P_{PGK1}$ -yPbSalAT-1- $T_{PHO5}$ | <i>P. bracteatum</i> | ACI45392 | S8                        |
| n/a | pCS3348 | $P_{PGK1}$ -yPbSalAT-2- $T_{PHO5}$ | <i>P. bracteatum</i> | ACI45393 | S8                        |
| n/a | pCS3349 | $P_{PGK1}$ -yPoSalAT- $T_{PHO5}$   | <i>P. orientale</i>  | ACI45395 | S8                        |
| n/a | pCS3350 | $P_{PGK1}$ -yPsAT1- $T_{PHO5}$     | <i>P. somniferum</i> | AFB74620 | Yanran Li,<br>unpublished |

**Table S2.** Retention times and MRM transitions used to quantify alkaloids in LC-MS/MS analysis.

| Compound                               | Method | Rt (min) | Quantifier MRM Transition |            |    | Qualifier MRM Transition |            |    |
|----------------------------------------|--------|----------|---------------------------|------------|----|--------------------------|------------|----|
|                                        |        |          | Precursor → Product Ion   | Fragmentor | CE | Precursor → Product Ion  | Fragmentor | CE |
| L-DOPA                                 | A      | 2.04     | 198→152                   | 135        | 20 |                          |            |    |
| Dopamine                               | A      | 2.11     | 154→91                    | 135        | 20 |                          |            |    |
| Reticuline                             | B      | 2.46     | 330→192                   | 120        | 19 | 330→137                  | 120        | 31 |
| Thebaine                               | B      | 3.11     | 312→251                   | 102        | 22 | 312→221                  | 102        | 14 |
| 3'-Hydroxy- <i>N</i> -methylcoclaurine | C      | 3.05     | 316→192                   | 135        | 25 |                          |            |    |
| Reticuline                             | C      | 3.92     | 330→192                   | 120        | 19 | 330→177                  | 120        | 43 |
| 1,2-Dehydroreticuline                  | C      | 3.61     | 328→312                   | 172        | 34 | 328→284                  | 172        | 34 |
| Salutaridine                           | C      | 3.77     | 328→237                   | 126        | 23 | 328→211                  | 126        | 23 |
| Thebaine                               | C      | 4.47     | 312→251                   | 102        | 22 | 312→221                  | 102        | 14 |
| Reticuline                             | D      | 3.74     | 330→192                   | 120        | 19 | 330→177                  | 120        | 43 |
| Thebaine                               | D      | 4.38     | 312→251                   | 102        | 22 | 312→221                  | 102        | 14 |
| Hydrocodone                            | D      | 3.03     | 300→199                   | 183        | 31 | 300→213                  | 183        | 31 |

**Table S3.** Plasmids and *S. cerevisiae* strains used in this study.

| Plasmid | Description                                                                                                                       | Source    |
|---------|-----------------------------------------------------------------------------------------------------------------------------------|-----------|
| pCS8    | pRS316, CEN/ARS vector, <i>URA3</i> selectable marker                                                                             | (66)      |
| pCS2765 | YAC vector pYES1L, $P_{TDH3}$ - <i>T6ODM</i> - $T_{ADH1}$ + $P_{PGK1}$ - <i>morB</i> - $T_{PHO5}$ , <i>TRP1</i> selectable marker | (13)      |
| pCS3352 | pEAQ-HT-GFP                                                                                                                       | (50)      |
| pCS3300 | CEN/ARS vector, $P_{HXT7}$ -yPbDRS-DRR <i>Pbr.89405</i> - $T_{CYC1}$ , <i>URA3</i> selectable marker                              | this work |
| pCS3301 | CEN/ARS vector, $P_{TDH3}$ -yPbDRS-DRR <i>Pbr.89405</i> - $T_{CYC1}$ , <i>URA3</i> selectable marker                              | this work |
| pCS3302 | CEN/ARS vector, $P_{HXT7}$ -yPsDRS-DRR <i>Pso.2062398</i> - $T_{CYC1}$ , <i>URA3</i> selectable marker                            | this work |
| pCS3303 | CEN/ARS vector, $P_{TDH3}$ -yPsDRS-DRR <i>Pso.2062398</i> - $T_{CYC1}$ , <i>URA3</i> selectable marker                            | this work |
| pCS3304 | CEN/ARS vector, $P_{HXT7}$ -yPbDRS-DRR <i>Pbr.12180</i> - $T_{CYC1}$ , <i>URA3</i> selectable marker                              | this work |
| pCS3305 | CEN/ARS vector, $P_{TDH3}$ -yPbDRS-DRR <i>Pbr.12180</i> - $T_{CYC1}$ , <i>URA3</i> selectable marker                              | this work |

|         |                                                                                                                                                                                                                                                |           |
|---------|------------------------------------------------------------------------------------------------------------------------------------------------------------------------------------------------------------------------------------------------|-----------|
| pCS3308 | YAC vector pYES1L, $P_{TDH3}$ -yPsSalSyn- $T_{ADH1}$ + $P_{PGK1}$ -yPsSalAT- $T_{PHO5}$ + $P_{TPI1}$ -yPbSalR- $T_{STE2}$ , TRP1 selectable marker                                                                                             | this work |
| pCS3309 | YAC vector pYES1L, $P_{TDH3}$ -PsSalSyn- $T_{ADH1}$ + $P_{PGK1}$ -yPsSalAT- $T_{PHO5}$ + $P_{TPI1}$ -yPbSalR- $T_{STE2}$ + $P_{HXT7}$ -yPbDRS-DRR (Pbr.89405)- $T_{CYC1}$ , TRP1 selectable marker                                             | this work |
| pCS3310 | YAC vector pYES1L, $P_{TDH3}$ -yPsSalSyn- $T_{ADH1}$ + $P_{PGK1}$ -yPsSalAT- $T_{PHO5}$ + $P_{TPI1}$ -yPbSalR- $T_{STE2}$ + $P_{HXT7}$ -yPbDRS-DRR (Pbr.89405)- $T_{CYC1}$ , TRP1 selectable marker                                            | this work |
| pCS3311 | YAC vector pYES1L, $P_{TDH3}$ -yEcCFS <sup>1-83</sup> -yPbSalSyn <sup>92-504</sup> - $T_{ADH1}$ + $P_{PGK1}$ -yPsSalAT- $T_{PHO5}$ + $P_{TPI1}$ -yPbSalR- $T_{STE2}$ + $P_{HXT7}$ -yPbDRS-DRR (Pbr.89405)- $T_{CYC1}$ , TRP1 selectable marker | this work |
| pCS3312 | pEAQ-PsSalSyn-3xHA                                                                                                                                                                                                                             | this work |
| pCS3313 | CEN/ARS vector, $P_{TDH3}$ -PsSalSyn-3xHA- $T_{CYC1}$ , URA3 selectable marker                                                                                                                                                                 | this work |
| pCS3314 | CEN/ARS vector, $P_{TDH3}$ -yPsSalSyn-3xHA- $T_{CYC1}$ , URA3 selectable marker                                                                                                                                                                | this work |
| pCS3315 | CEN/ARS vector, $P_{TDH3}$ -yPsSalSyn <sup>N105A</sup> -3xHA- $T_{CYC1}$ , URA3 selectable marker                                                                                                                                              | this work |
| pCS3316 | CEN/ARS vector, $P_{TDH3}$ -yPsSalSyn <sup>N331A</sup> -3xHA- $T_{CYC1}$ , URA3 selectable marker                                                                                                                                              | this work |
| pCS3317 | CEN/ARS vector, $P_{TDH3}$ -yPsSalSyn <sup>N105AN331A</sup> -3xHA- $T_{CYC1}$ , URA3 selectable marker                                                                                                                                         | this work |
| pCS3318 | CEN/ARS vector, $P_{TDH3}$ -yPbSalSyn-3xHA- $T_{CYC1}$ , URA3 selectable marker                                                                                                                                                                | this work |
| pCS3319 | CEN/ARS vector, $P_{TDH3}$ -yEcCFS-3xHA- $T_{CYC1}$ , URA3 selectable marker                                                                                                                                                                   | this work |
| pCS3320 | CEN/ARS vector, $P_{TDH3}$ -yEcCFS <sup>1-83</sup> -yPsSalSyn <sup>95-505</sup> -3xHA- $T_{CYC1}$ , URA3 selectable marker                                                                                                                     | this work |
| pCS3321 | CEN/ARS vector, $P_{TDH3}$ -yEcCFS <sup>1-83</sup> -yPbSalSyn <sup>92-504</sup> -3xHA- $T_{CYC1}$ , URA3 selectable marker                                                                                                                     | this work |
| pCS3322 | CEN/ARS vector, $P_{TDH3}$ -PsSalSyn- $T_{CYC1}$ , URA3 selectable marker                                                                                                                                                                      | this work |
| pCS3323 | CEN/ARS vector, $P_{TDH3}$ -yPsSalSyn- $T_{CYC1}$ , URA3 selectable marker                                                                                                                                                                     | this work |
| pCS3324 | CEN/ARS vector, $P_{TDH3}$ -yPsSalSyn <sup>N105A</sup> - $T_{CYC1}$ , URA3 selectable marker                                                                                                                                                   | this work |
| pCS3325 | CEN/ARS vector, $P_{TDH3}$ -yPsSalSyn <sup>N331A</sup> - $T_{CYC1}$ , URA3 selectable marker                                                                                                                                                   | this work |
| pCS3326 | CEN/ARS vector, $P_{TDH3}$ -yPsSalSyn <sup>N105AN331A</sup> - $T_{CYC1}$ , URA3 selectable marker                                                                                                                                              | this work |
| pCS3327 | CEN/ARS vector, $P_{TDH3}$ -yEcCFS <sup>1-23</sup> -yPsSalSyn <sup>33-505</sup> - $T_{CYC1}$ , URA3 selectable marker                                                                                                                          | this work |
| pCS3328 | CEN/ARS vector, $P_{TDH3}$ -yEcCFS <sup>1-26</sup> -yPsSalSyn <sup>36-505</sup> - $T_{CYC1}$ , URA3 selectable marker                                                                                                                          | this work |
| pCS3329 | CEN/ARS vector, $P_{TDH3}$ -yEcCFS <sup>1-31</sup> -yPsSalSyn <sup>42-505</sup> - $T_{CYC1}$ , URA3 selectable marker                                                                                                                          | this work |
| pCS3330 | CEN/ARS vector, $P_{TDH3}$ -yEcCFS <sup>1-33</sup> -yPsSalSyn <sup>44-505</sup> - $T_{CYC1}$ , URA3 selectable marker                                                                                                                          | this work |
| pCS3331 | CEN/ARS vector, $P_{TDH3}$ -yEcCFS <sup>1-40</sup> -yPsSalSyn <sup>51-505</sup> - $T_{CYC1}$ , URA3 selectable marker                                                                                                                          | this work |
| pCS3332 | CEN/ARS vector, $P_{TDH3}$ -yEcCFS <sup>1-66</sup> -yPsSalSyn <sup>78-505</sup> - $T_{CYC1}$ , URA3 selectable marker                                                                                                                          | this work |
| pCS3333 | CEN/ARS vector, $P_{TDH3}$ -yEcCFS <sup>1-83</sup> -yPsSalSyn <sup>95-505</sup> - $T_{CYC1}$ , URA3 selectable marker                                                                                                                          | this work |
| pCS3334 | CEN/ARS vector, $P_{TDH3}$ -yEcCFS <sup>1-90</sup> -yPsSalSyn <sup>102-505</sup> - $T_{CYC1}$ , URA3 selectable marker                                                                                                                         | this work |
| pCS3335 | CEN/ARS vector, $P_{TDH3}$ -yPbSalSyn- $T_{CYC1}$ , URA3 selectable marker                                                                                                                                                                     | this work |
| pCS3336 | CEN/ARS vector, $P_{TDH3}$ -yEcCFS <sup>1-23</sup> -yPbSalSyn <sup>30-504</sup> - $T_{CYC1}$ , URA3 selectable marker                                                                                                                          | this work |

|         |                                                                                                                                                  |           |
|---------|--------------------------------------------------------------------------------------------------------------------------------------------------|-----------|
| pCS3337 | CEN/ARS vector, $P_{TDH3}$ -yEcCFS <sup>1-26</sup> -yPbSalSyn <sup>33-504</sup> -T <sub>CYC1</sub> , URA3 selectable marker                      | this work |
| pCS3338 | CEN/ARS vector, $P_{TDH3}$ -yEcCFS <sup>1-83</sup> -yPbSalSyn <sup>92-504</sup> -T <sub>CYC1</sub> , URA3 selectable marker                      | this work |
| pCS3339 | CEN/ARS vector, $P_{TDH3}$ -BM3 <sup>1-6</sup> -yPsSalSyn <sup>44-486</sup> -BM3 <sup>449-1049</sup> -T <sub>CYC1</sub> , URA3 selectable marker | this work |
| pCS3340 | CEN/ARS vector, $P_{TDH3}$ -BM3 <sup>1-6</sup> -yPbSalSyn <sup>41-495</sup> -BM3 <sup>449-1049</sup> -T <sub>CYC1</sub> , URA3 selectable marker | this work |

| Strain  | Genotype                                                                                                                                                                                                                                                                                    | Source                    |
|---------|---------------------------------------------------------------------------------------------------------------------------------------------------------------------------------------------------------------------------------------------------------------------------------------------|---------------------------|
| CSY3    | W303 ( <i>Mat<math>\alpha</math></i> , <i>ade2-1</i> ; <i>ura3-1</i> ; <i>his3-11,15</i> ; <i>trp1-1</i> ; <i>leu2-3,112</i> ; <i>can 1-100</i> )                                                                                                                                           | K. Weis                   |
| CSY288  | CSY3 <i>his3<math>\Delta</math></i> :: $P_{TEF1}$ -Ps6OMT-T <sub>CYC1</sub> , <i>leu2<math>\Delta</math></i> :: $P_{TEF1}$ -PsCNMT-T <sub>CYC1</sub> , <i>ura3<math>\Delta</math></i> :: $P_{TEF1}$ -Ps4'OMT-T <sub>CYC1</sub>                                                              | (11)                      |
| CSY893  | CEN.PK2-1D ( <i>Mat<math>\alpha</math></i> ; <i>ura3-52</i> ; <i>trp1-289</i> ; <i>leu2-3,112</i> ; <i>his3<math>\Delta</math>1</i> ; <i>MAL2-8<sup>C</sup></i> ; <i>SUC2</i> )                                                                                                             | EUROSCARF acc. No. 30000B |
| CSY1055 | CSY893 <i>ybr197c<math>\Delta</math></i> :: $P_{TPI1}$ -yRnSpr-T <sub>STE2</sub> , $P_{TEF1}$ -yRnPts-T <sub>CYC1</sub> , <i>KanMX</i> , $P_{TDH3}$ -yRnQdpr-T <sub>ADH1</sub> , $P_{PGK1}$ -yRnPcbd1-T <sub>PHO5</sub>                                                                     | this work                 |
| CSY1056 | CSY1055 <i>ydr514c<math>\Delta</math></i> :: $P_{PYK1}$ -PsCNMT-T <sub>MFa1</sub> , $P_{PGK1}$ -Ps6OMT-T <sub>PHO5</sub> , $P_{TDH3}$ -yEcNMCH-T <sub>ADH1</sub> , <i>LEU2</i> , $P_{TEF1}$ -yPsCPR-T <sub>CYC1</sub> , $P_{TPI1}$ -yPs4'OMT-T <sub>STE2</sub>                              | this work                 |
| CSY1057 | CSY1056 <i>ymr206w<math>\Delta</math></i> :: $P_{TDH3}$ -RnTh <sup>WR</sup> -T <sub>ADH1</sub> , $P_{TPI1}$ -yPpddc-T <sub>STE2</sub> , <i>HIS5</i> , $P_{TEF1}$ -yRnDhfr-T <sub>CYC1</sub> , $P_{PGK1}$ -yCjNCS-T <sub>PHO5</sub>                                                          | this work                 |
| CSY1058 | CSY1057 <i>ybl059w<math>\Delta</math></i> ::ARO4 <sup>Q166K</sup> , ARO7 <sup>T226I</sup> , <i>hphNTI</i> , $P_{TDH3}$ -TKL1-T <sub>ADH1</sub>                                                                                                                                              | this work                 |
| CSY1059 | CSY1057 <i>ybl059w<math>\Delta</math></i> ::ARO4 <sup>Q166K</sup> , ARO7 <sup>T226I</sup> , <i>hphNTI</i> , $P_{TEF1}$ -ARO10-T <sub>CYC1</sub> , $P_{TDH3}$ , <i>TKL1-T<sub>ADH1</sub></i>                                                                                                 | this work                 |
| CSY1060 | CSY1059 <i>ypl250c<math>\Delta</math></i> :: $P_{TDH3}$ -RnTh <sup>WR</sup> -T <sub>ADH1</sub> , $P_{TEF1}$ -Ps4'OMT-T <sub>CYC1</sub> , $P_{PGK1}$ -yCjNCS-T <sub>PHO5</sub> , <i>ble</i>                                                                                                  | this work                 |
| CSY1061 | CSY1059 <i>zwf1<math>\Delta</math></i> :: $P_{TDH3}$ -RnTh <sup>WR</sup> -T <sub>ADH1</sub> , $P_{TEF1}$ -Ps4'OMT-T <sub>CYC1</sub> , $P_{PGK1}$ -yCjNCS-T <sub>PHO5</sub> , <i>ble</i>                                                                                                     | this work                 |
| CSY1064 | CSY1060 <i>trp1<math>\Delta</math></i> :: $P_{PGK1}$ -yPsSalAT-T <sub>PHO5</sub> , $P_{TPI1}$ -yPbSalR-T <sub>STE2</sub> , <i>URA3</i> , $P_{TDH3}$ -yEcCFS <sup>1-83</sup> -yPbSalSyn <sup>92-504</sup> -T <sub>ADH1</sub> , $P_{HXT7}$ -yPbDRS-DRR ( <i>Pbr.89405</i> )-T <sub>CYC1</sub> | this work                 |
| CSY1065 | CSY1061 <i>trp1<math>\Delta</math></i> :: $P_{PGK1}$ -yPsSalAT-T <sub>PHO5</sub> , $P_{TPI1}$ -yPbSalR-T <sub>STE2</sub> , <i>URA3</i> , $P_{TDH3}$ -yEcCFS <sup>1-83</sup> -yPbSalSyn <sup>92-504</sup> -T <sub>ADH1</sub> , $P_{HXT7}$ -yPbDRS-DRR ( <i>Pbr.89405</i> )-T <sub>CYC1</sub> | this work                 |
| CSY1071 | CSY288 <i>trp1<math>\Delta</math></i> :: $P_{TEF1}$ -yPsCPR-T <sub>CYC1</sub>                                                                                                                                                                                                               | this work                 |

**Table S4.** Intermediate analysis for optimization of the reticuline-producing platform strain through pathway and strain engineering. Reticuline in the growth media was analyzed by LC-MS/MS MRM and quantified with an external standard curve. Error is the standard deviation of three biological replicates. This data is depicted in Fig. 1B.

| Molecule ( $\mu$ g/L) | CSY1057 | 1058 | 1059        | 1060        | 1061        |
|-----------------------|---------|------|-------------|-------------|-------------|
| L-DOPA                | NM      | NM   | 88 $\pm$ 16 | 60 $\pm$ 30 | 70 $\pm$ 40 |

|                                                     |              |            |             |            |              |
|-----------------------------------------------------|--------------|------------|-------------|------------|--------------|
| Dopamine                                            | NM           | NM         | 9600 ± 1400 | 9200 ± 200 | 12000 ± 2000 |
| 3'-Hydroxy- <i>N</i> -methylcoclaurine <sup>a</sup> | 1.0 ± 0.2    | 31.2 ± 1.1 | 28 ± 2      | 8.5 ± 1.0  | 14.9 ± 0.4   |
| Reticuline                                          | 12.28 ± 0.04 | 20.7 ± 0.2 | 20.0 ± 0.3  | 68 ± 2     | 82 ± 3       |

NM indicates not measured.

<sup>a</sup>Relative MRM peak area, where 1 is the peak area for CSY1057.

**Table S5.** Intermediate analysis for comparison of thebaine produced from SalSyn variants in yeast. Yeast strains were fed 1 mM *rac*-norlaudanoline, and thebaine in the growth media was quantified by LC-MS/MS MRM with an external standard curve. Error is the standard deviation of at least three biological replicates. This data is depicted in Fig. 3C.

| Molecule (μg/L)                    | CSY1071+pCS3309 (PsSalSyn) | yPsSalSyn   | yEcCFS <sup>1-83</sup> -yPbSalSyn <sup>92-504</sup> |
|------------------------------------|----------------------------|-------------|-----------------------------------------------------|
| Reticuline                         | 660 ± 50                   | 570 ± 40    | 480 ± 100                                           |
| 1,2-Dehydroreticuline <sup>a</sup> | 1.00 ± 0.10                | 1.02 ± 0.04 | 0.95 ± 0.11                                         |
| Salutaridine <sup>a</sup>          | 1.00 ± 0.10                | 1.36 ± 0.10 | 4.4 ± 1.3                                           |
| Thebaine                           | 16.7 ± 0.8                 | 20.8 ± 1.4  | 56 ± 18                                             |

<sup>a</sup>Relative MRM peak area, where 1 is the peak area for CSY1071+pCS3309.

**Table S6.** Intermediate analysis for complete biosynthesis of the opiate thebaine and semi-synthetic opioid drug hydrocodone in yeast. Growth media was analyzed for opioids by LC-MS/MS MRM and thebaine was quantified with an external standard curve. Error is the standard deviation of at least three biological replicates. This data is depicted in Fig. 4.

| Molecule (μg/L) | CSY1064+empty YAC |                      | CSY1064+pCS2765   |                      |
|-----------------|-------------------|----------------------|-------------------|----------------------|
|                 | No 2-oxoglutarate | 50 mM 2-oxoglutarate | No 2-oxoglutarate | 50 mM 2-oxoglutarate |
| Reticuline      | 31.3 ± 1.0        | 31.2 ± 0.9           | 34.6 ± 1.4        | 29.5 ± 0.9           |
| Thebaine        | 6.4 ± 0.3         | 2.4 ± 0.9            | 7.7 ± 0.5         | 2.4 ± 1.2            |
| Hydrocodone     | ND                | ND                   | ND                | ~0.3                 |

ND indicates not detected.

**Table S7.** Mutagenesis, fusion, and assembly oligonucleotide primers used in this study.

| Primer Name                      | Primer Sequence (5'→3') |
|----------------------------------|-------------------------|
| Mutagenesis primers <sup>a</sup> |                         |

|                    |                                                |
|--------------------|------------------------------------------------|
| PsSalRI275A.R      | GCCGTAGTTCATTTCTGTTTTAACCAAACCAGG              |
| PsSalRI275A.F      | GAAATGAACTACGGCGCTGGAAATTATACTGCC              |
| PsSalRF104A.R      | ACCTGCAACCCCAGCATTGTTTACCAAG                   |
| PsSalRF104A.F      | GCTGGGGTTGCAGGTGCTTCAGTTGATGCTGATCG            |
| PbSalRF104A.F      | GCTGGGGTAGCGGGGGCTAGCGTAGAT                    |
| PbSalRF104A.R      | CCCCGCTACCCCAGCATTATTCACAAGTATGTCTA            |
| PbSalRI275A.F      | AGACAGAAATGAACTACGGTGCTGGTAATTATACAGC          |
| PbSalRI275A.R      | ACCGTAGTTCATTTCTGTCTTTACCAAACC                 |
| yPsSalSynN39A.Fv3  | TTTCGTTTTATCAAAGTGCA <del>GCA</del> ACTACTGAA  |
| yPsSalSynN39A.Rv3  | TGCAC <del>TTT</del> GATAAAACGAAATTTTAGAGA     |
| yPsSalSynN105A.Fv2 | AAGGGAGGTCTTGGTC <del>GCC</del> AAAAGTGCTGA    |
| yPsSalSynN105A.Rv2 | TCAGCAC <del>TTTT</del> GGCGACCAAGACCTCCCTT    |
| yPsSalSynN331A.Rv2 | CGTTGTCCACCAGTTCTA <del>GCG</del> TTTTATCTCTCT |
| yPsSalSynN331A.Fv2 | TAGA <del>ACT</del> GGTGGACAACGTC              |

---

Fusion cloning primers<sup>b</sup>

---

|                           |                                                             |
|---------------------------|-------------------------------------------------------------|
| BM3-D41yPbSalSyn.gibF     | <del>CAATGTCTATCAAAGAAATG</del> CCAGAAGGTCCAAAAACCTTGC      |
| D41yPbSalSyn-BM3.gibR     | <del>GGAATCTTCTTGGATTTAGC</del> TGGGGTAACCTTAGCTTCCAATG     |
| yPsSS486-Bm3_483.R        | <del>AATGGAATCTTCTTGGATTTAGC</del> TAGAATAAAAGATATAGCCTCGCT |
|                           | CAGATCGGGTAG                                                |
| yPsSS486-Bm3_483.F        | <del>AGCGAGGCTATATCTTTTATTCTA</del> GCTAAATCCAAGAAGATTCCATT |
|                           | GGGTGGTATC                                                  |
| EcCFS31-                  | <del>CAGGCCATTCC</del> CATAGTTGAGATAGATGATGATTTCTTTAACAAT   |
| D41yPsSS.Nterm.gibRv2     |                                                             |
| EcCFS31-                  | <del>CTCAACTATG</del> GGAATGGCCTGCTGGACCG                   |
| D41yPsSalSyn.Cterm.gibFv2 |                                                             |
| pENTR-EcCFS33.R           | CCATTCCATAGTTGAGATAGATGATGATTTCTTTAACAATTTGG                |
| EcCFS33-D43yPsSS.F        | <del>CTATCTCAACTATGGAATGG</del> CCTGCTGGACCGAAGACTCTTCCCA   |
| D50yPsSalSyn.fwd          | <del>CTAAGAAATTACC</del> CATAATTGGCAATTTGCATCAATTG          |
| EcCFSN50.rev              | <del>GCCAATTATGGG</del> TAATTTCTTAGGACCTTAGGCCATTC          |
| D77yPsSalSyn.fwd          | <del>TACATGGTGG</del> TGCCTTTACCATTTGGATTG                  |
| EcCFSN77.rev              | <del>GTAAGGCACCACC</del> ATGATTTTGGCTAAATTTGCTAATAC         |
| D94yPsSalSyn.fwd          | <del>GTAATCTCTG</del> ACATTGATAATGCAAGGGAGGTTTTG            |
| EcCFSN94.rev              | <del>GCATTATCAATGTC</del> AGAGATTACAATCATAGGCCTCCAG         |
| D101yPsSalSyn.fwd         | <del>CTTGGGAGGT</del> TTTGGTCAACAAAAGTGCTGATTATAG           |
| EcCFSN101.rev             | <del>GACCAAACCT</del> CCCAAGCCTTATCAATGTCAG                 |
| EcCFSs-SalSyn.linkF       | <del>GTCTTTGCTATCGCCAATTGTTAAAG</del> TTTTATCAAAGCGCAAATAC  |
|                           | TACTGAATG                                                   |
| EcCFSs-SalSyn.linkR       | <del>CATTCAGTAGTATTTGCGCTTTGATAAAA</del> CTTTAACAATTTGGCGAT |
|                           | AGCAAAGAC                                                   |
| EcCFSI-SalSyn.linkF       | <del>CTATCGCCAATTGTTAAAGAAATCATCA</del> AGCGCAAATACTACTGAA  |
|                           | TGGC                                                        |
| EcCFSI-SalSyn.linkR       | <del>GCCATTCAGTAGTATTTGCGCT</del> TGATGATTTCTTTAACAATTTGGCG |
|                           | ATAG                                                        |
| D91yPbSalSyn.fwd          | <del>GTAATCTCT</del> GATATTGATAACGCCAGAGAAGTTTTGG           |
| EcCFSN94-D91yPbSS.rev     | <del>GGCGTTATCAATATCAGAGATTACA</del> AATCATAGGCCTCCAG       |

---



| DNA assembly primers <sup>c</sup> |                                                                      |
|-----------------------------------|----------------------------------------------------------------------|
| YBL059W.Upstream.FW               | CACAATTCGAAGCCGTATCTAACGCAG                                          |
| YBL059W.Upstream.RV               | CATCGAAACATACATCATTCACTGATTTACAAGTGCAGTTGAACAAAAGC                   |
| YBL059W.Downstream.FW             | CTCTACCGGCAGATCTAGTGTTATACCATAGTAGTAGTTTCAATAATATATTCCACTACTTATATGTG |
| YBL059W.Downstream.RV             | CATCATAGCGATAAAGCGGACCATCGG                                          |
| YBR197C.Upstream.FW               | TGAAAAAGGCCACTACTGAGCCAAGC                                           |
| YBR197C.Upstream.RV               | GCTTTTACGAGTTCAATTATTTGTCTTCGTTTCGTGCCAGCAAC                         |
| YBR197C.Downstream.FW             | AAAAGGAAGAGTGAAATGACATGTATGGGTTGAAAATATTTAGAGGATGCTAAAAG             |
| YBR197C.Downstream.RV             | CAACATTGCATAGCATCCAAATACGTGAAAGC                                     |
| YMR206W.Upstream.FW               | CAACATGAAGCGAGAGACTTCATTGCG                                          |
| YMR206W.Upstream.RV               | CTCTACCGGCAGATCCATGGTTATATTCTGTTGTCTTCTTTACTTTAAGCGAAAG              |
| YMR206W.Downstream.FW             | AAAAGGAAGAGTGAAATAGTTGATTAGAAGACTATAGCTAAATAATCATTTTCATTGGGAAATGAC   |
| YMR206W.Downstream.RV             | GTATGCCGATGTTGAATCTAGGGGAGG                                          |
| YDR514C.Upstream.FW               | GTTTGTTCCTTCTTATCTTCAGCTGCTGAG                                       |
| YDR514C.Upstream.RV               | ATCCTAAGAGAATTCACAATAGCTTATAATCTGTGTAGTCAAACATATACTAGGC              |
| YDR514C.Downstream.FW             | GCTTTTACGAGTTCAATCTAGCTAGAAGTTTTGTAGGTATATGTGATTTAAGATATAG           |
| YDR514C.Downstream.RV             | CATTATCACGTTGTTTGCCACAAGAATTATTG                                     |
| YPL250C.Upstream.FW               | CTCTCGTCGTCAATTAACAGCGTGAG                                           |
| YPL250C.Upstream.RV               | CTCTACCGGCAGATCCATTGTAAATAATTGTAATTGTATATTATTGTGTGTAAGTTTGGTTGG      |
| YPL250C.Downstream.FW             | ATCAGATCCACTAGTGGCCTATGCGTGACGCATTTTACCACATCTCTACTTGTTTC             |
| YPL250C.Downstream.RV             | GATTATTCACAGGAGAAATTGGGGGCAC                                         |
| ZWF1.Upstream.FW                  | GCGAGCTTTCGGGTTTAGAAACATC                                            |
| ZWF1.Upstream.RV                  | CTCTACCGGCAGATCCATCTTGCCCTTATGTGGTTTTCTATTCTATTGGATTAC               |
| ZWF1.Downstream.FW                | ATCAGATCCACTAGTGGCCTATGCGTAGAAAAATGCAAGCACATTCATTTATCGGCTAAG         |
| ZWF1.Downstream.RV                | CAGAATACAGGCAAGAAGGGCATTG                                            |
| TRP1.Upstream.FW                  | AGTTAGAGGCGGTGGAGATATTCC                                             |
| TRP1.Upstream.RV                  | AAAAGGAAGAGTGAAATTCACCAATGGACCAGAACTACCT                             |
| TRP1.Downstream.FW                | GAAGGCTTTAATTTGACTGAGTAGTATTTATTTAAGTATT                             |
| TRP1.Downstream.RV                | CTGATGGTGTTTATGCAAAG                                                 |

<sup>a</sup> Red letters denote mutagenesis sites.

<sup>b</sup> Red letters denote regions of overlap for Gibson assembly of fusions.

<sup>c</sup> Red letters denote regions of overlap with expression cassettes.

**Table S8.** New codon-optimized DNA sequences used in this study.

| Plasmid | Gene             | Coding sequence                                                                                                                                                                                 |
|---------|------------------|-------------------------------------------------------------------------------------------------------------------------------------------------------------------------------------------------|
| pCS3335 | <i>yPbSalSyn</i> | ATGGCCCCAATCAACATCGAAGAAAATGATTTCTGGATGATTGCCTGCACCGTTATTATCGTTTTTGCCTTGATGAA GTTCATGGTTTCCTTCTACCAATCTGCTAACACTACTGATGGCCAGAAGGTCCAAAAACCTTGCCAATTATTGGTA ACTTGATCAATTGGGTGGTGGTGTTCATTGCAAGTT |

---

GCTTTAGCTAATTTGGCTAAAGTTTACGGTGGTGCTTTC  
ACCATTTGGATTGGTTCTTGGGTTCCAATGATCGTTATC  
TCCGATATTGATAACGCCAGAGAAGTTTTGGTTAACAA  
GTCTGCTGATTACTCCGCTAGAGATGTTCCAGATATTTT  
GAAGATTATTACCGCCAACGGTAAGAACATTGCTGATT  
GTGATTCTGGTCCATTCTGGCATCATTTGAAGAAGGGT  
TTACAATCCTGCATCAACCCATCTAACGTTATGTCTTTG  
TCCAGATTGCAAGAAAAGGACATGCAAAACTTGATTAA  
GTCCATGCAAGAAAGAGCCTCTCAACAAAACGGTATCT  
TGAACCATTGGATCATGCTAAAGAAGCCTCCATCAGA  
TTATTGTCCAGAGTTATTTTCGGTCAAGACTTCTCCAAC  
GAAGATTTGGTTATTGGTGTAAAGGATGCCTTGGACGA  
AATGGTTAGAATTTCTGGTTTGGCTTCTTTGGCTGATGC  
TTTCAAAATTGCTAAGTACTTGCCATCCCCAAAAAAGAA  
CATCAGAGATATGTACGCCACCAGAGATAGAGTTTACA  
ACTTGATTCAACCACACATCGTCAGTAATTTGCCAGCC  
AATTCATTCTTGCAATTTCTTGACCTCTCAAGACTACTCT  
GACGAAATCATCTACTCCATGGTTTTGGAAATTTTCGGT  
TTGGGTGTTGATTCTACTGCTGCTACAGCTGTTTGGGC  
TTTGTCTTTTTTGGTTGGTGAACAAGAAATCCAAGAAAA  
GTTGTACAGAGAAATCAACAACCTTGACCGGTGGTCAAA  
GACCAGTTAAGGTTGTTGACTTGAAGAATTGCCATAC  
TTGCAAGCCGTTATGAAAGAAACCTTGAGAATGAAGCC  
AATTGCTCCATTGGCTGTTCCACATGTTGCTGCTAAAG  
ATACCACTTTTAAGGGTAGAAGAATCGTCAAGGGTACT  
AAGGTTATGGTTAACTTGTACGCCATTCATCACGATCCA  
AATGTTTTTCCAGCTCCATACAAGTTCATGCCTGAAAGA  
TTTTTGAAGGGTGTTAACTCCGATGGTAGATACGGTGA  
TATTAACACCATGGAATCCTCATTGATTCCATTTGGTGC  
TGGTATGAGAATTTGCGGTGGTGTGAAATTGGCAAAAC  
AAATGGTTGGTTTTGCTTTGGCCTCTATGGTCAATGAAT  
TTAAGTGGGATTGTGTCTCCGAAGGTAACCTACCAGAT  
TTGTCTGAAGCTATCTCCTTCATCTTGTACATGAAGAAT  
CCATTGGAAGCTAAGGTTACCCCAAGAACTAAGCCATT  
CGATTCTAGATGA

pCS3273 *yEcCFS*<sup>1-83</sup>-*yPbSalSyn*<sup>92-504</sup>

ATGGAAGAGTCTTTATGGGTCGTTACTGCAACTGTTGT  
AGTCGTCTTTGCTATCGCCAAATTGTTAAAGAAATCATC  
ATCTATCTCAACTATGGAATGGCCTAAGGGTCCCTAAGA  
AATTACCAATCATCGGTAACCTTACACCAGTTAGGTGGA  
GAAGCATTTCACGTTGTATTAGCAAATTTAGCCAAAATA  
CATGGTACAGTAATGACTATTTGGGTAGGAGCCTGGAG  
GCCTATGATTGTAATCTCTGATATTGATAACGCCAGAGA  
AGTTTTGGTTAACAAGTCTGCTGATTACTCCGCTAGAG  
ATGTTCCAGATATTTTGAAGATTATTACCGCCAACGGTA  
AGAACATTGCTGATTGTGATTCTGGTCCATTCTGGCAT  
CATTTGAAGAAGGGTTTACAATCCTGCATCAACCCATCT  
AACGTTATGTCTTTGTCCAGATTGCAAGAAAAGGACAT  
GCAAACTTGATTAAGTCCATGCAAGAAAGAGCCTCTC  
AACAAAACGGTATCTTGAACCATTGGATCATGCTAAA  
GAAGCCTCCATCAGATTATTGTCCAGAGTTATTTTCGGT  
CAAGACTTCTCCAACGAAGATTTGGTTATTGGTGTAAAG  
GATGCCTTGGACGAAATGGTTAGAATTTCTGGTTTGGC  
TTCTTTGGCTGATGCTTTCAAAATTGCTAAGTACTTGCC  
ATCCAAAAAAGAACATCAGAGATATGTACGCCACCA  
GAGATAGAGTTTACAACCTTGATTCAACCACACATCGTCA  
GTAATTTGCCAGCCAATTCATTCTTGCAATTTCTTGACCT

pCS3300 *yPbDRS-DRR (Pbr.89405)*

CTCAAGACTACTCTGACGAAATCATCTACTCCATGGTTT  
TGGAAATTTTCGGTTTGGGTGTTGATTCTACTGCTGCTA  
CAGCTGTTTGGGCTTTGTCTTTTTTGGTTGGTGAACAA  
GAAATCCAAGAAAAGTTGTACAGAGAAATCAACAACCTT  
GACCGGTGGTCAAAGACCAGTTAAGGTTGTTGACTTGA  
AAGAATTGCCATACTTGCAAGCCGTTATGAAAGAAACC  
TTGAGAATGAAGCCAATTGCTCCATTGGCTGTTCCACA  
TGTTGCTGCTAAAGATACCACTTTTAAGGGTAGAAGAAT  
CGTCAAGGGTACTAAGGTTATGGTTAACTTGTACGCCA  
TTCATCACGATCCAAATGTTTTCCAGCTCCATACAAGT  
TCATGCCTGAAAGATTTTTGAAGGGTGTAACTCCGAT  
GGTAGATACGGTGATATTAACACCATGGAATCCTCATT  
GATTCCATTTGGTGCTGGTATGAGAATTTGCGGTGGTG  
TTGAATTGGCAAACAAATGGTTGGTTTTGCTTTGGCCT  
CTATGGTCAATGAATTTAAGTGGGATTGTCTCCGAA  
GGTAACTTACCAGATTTGTCTGAAGCTATCTCCTTCATC  
TTGTACATGAAGAATCCATTGGAAGCTAAGGTTACCCC  
AAGAACTAAGCCATTTCGATTCTAGATGA  
ATGGAATTGCAATACTTCTCCTACTTCCAACCTACCTCT  
TCTGTTGTTGCTTTGTTGTTGGCATTGGTCAGTATCTTG  
TTTTCCGTTGTTGTTTTGAGAAAGACCTTCTCCAACAAC  
TATTCTTCTCCAGCTTCTTCTACTGAAACCGCTGTTTTG  
TGTCATCAAAGACAACAATCTTGCGCCTTGCCAAATTTCT  
GGTTTGTTCATGTTTTCATGAACAAGAACGGTTTGATC  
CATGTTACCTTGGGTAATATGGCTGATAAGTACGGTCC  
AATTTTCTCTTTTCCAACCGTTCTCATAGAACCTTGGT  
TGTTTCTTCTTGGGAAATGGTCAAAGAATGTTTCACCG  
GTAACAACGATACCGCCTTTTCTAATAGACCAATTCCAT  
TGGCTTTCAAGACCATTTTCTATGCCTGTAGAGGTATC  
GACTCTTACGGTTTATCTTCTGTTCCATACGGTAAATAT  
TGGAGAGAATTGAGAAAGGTTTTCGTCCACAACCTTGT  
GTCCAATCAACAATTATTGAAGTTCAGACACTTGATCAT  
CTCCCAAGTTGATACCTCCTTCAACAAGTTATACGAATT  
GTGCAAGAACTCCGAAGATAATCAAGGTATGGTTAGAA  
TGGATGATTGGTTGGCTCAATTGTCCTTCTCAGTTATTG  
GTAGAATCGTTTTCGGTTTCCAATCTGATCCAAAACT  
GGTGCTCCATCTAGAGTCGAACAATTCAAAGAAGCTAT  
TAACGAAGCCTCCTACTTTCATGTCTACTTCTCAGTTTC  
TGATAACGTTCCAATGTTGGGTTGGATCGATCAATTGA  
CTGGTTTGAAGTGAACAATGACCCATTGTGGTAAGAAG  
TTGGATTTGTTGTCGAATCCATCATCAACGATCACAG  
ACAAAAGAGAAGATTCTCCAGAACAAAAGGTGGTGACC  
AAAAGGATGATGAACAAGATGATTTTCATCGACATCTGC  
TTGTCCATTATGGAACAACCACAATTGCCAGGTAACAA  
CAATCCACCAAAAATCCCAATCAAGTCCATCGTTTTGGA  
TATGATTGGTGCTGGTACTGATACCACTAAGTTGACTAT  
TATTTGGACCTTGTCTTGTGTTGAACAACCCAAATGT  
TTTGGCTAAGGCCAAACAAGAAGTTGACGCTCATTTTG  
AACTAAGAAGAGATCTACCAACGAAGCTTCTGTCTGTT  
GTTGATTTTCGATGATATTGGTAACTTGGTCTACATCCAA  
GCCATTATCAAAGAATCCATGAGATTATACCCAGTCTCC  
CCAGTTGTTGAAAGATTGTCTGATCTGAAGATTGTGTTGTT  
GGTGGTTTTTCATGTTCCAGCTGGTACTAGATTGTGGGC  
TAATGTTTGGAAAATGCAAAGAGATCCAAAGGTTTGGG  
ATGACCCTTTGGTTTTTGTAGACCAGAAAGATTCTTGTCCG  
ACGAACAAAAAATGGTTGATGTTAGAGGTCAAATTAC

GAATTATTGCCATTTGGTGCCGGTAGAAGAATTTGTCC  
AGGTGTTTCTTTCTCCTTGGATTTGATGCAATTGGTCTT  
GACCAGATTGATCTTGAATTCGAAATGAAATCTCCATC  
CGATAAGGTTGATATGACTGCTACTCCAGGTTTGATGT  
CTTACAAAGTTGTTCCATTGGACATCTTGTTGACCATA  
GAAGAATCAAGTCTTGCGTTCAATTGGCCTCTTCTGAA  
AGAGATATGGAATCTTCTGGTGTTCCAGTTATCACTTTG  
AGATCTGGTAAAGTTATGCCAGTTTTGGGTATGGGTAC  
TTTTGAAAAGCTGGTAAGGGTTCCGAAAGAGAAAGAT  
TGGCTATTTTGAAGGCCATCGAAGTTGGTTACAGATAC  
TTTGATACTGCTGCTGCTTACGAAACCGAAGAAGTTTTA  
GGTGAAGCTATTGCTGAAGCCTTGCAATTGGGTTTAAT  
CAAGTCAAGAGATGAATTATTCATTTCTCCATGTTGTG  
GTGTACTGATGCTCATCCAGATAGAGTTTTGTTGGCATT  
GCAAACTCATTGAGAACTTGAAGTTGGAATACGTCG  
ACTTGTACATGTTGCCATTTCCAGCTTCATTGAAGCCAG  
GTAAGATTACCATGGATATCCCAGAAGAAGATATCTGC  
CCAATGGATTATAGATCTGTTTGGTCTGCTATGGAAGA  
ATGCCAAAATTTGGGTTTGACCAAGTCCATTGGTGTCT  
CTAATTTCTCCTGCAAAAAGTTGGAAGAATTGATGGCTA  
CTGCTAACATTCCACCAGCTGTAATCAAGTTGAAATGT  
CTCCAGCTTTCCAACAAAAGAAGTTGAGAGAATACTGC  
AACGCTAACACATTTTGGTTTCCGCCGTTTCTATTTTG  
GGTTCTAATGGTACTCCATGGGGTTCAAATGCTGTTTTA  
GGTTCTGAAGTCTTGAAAAGATTGCTATGGCCAAGGG  
TAAATCCGTTGCTCAAGTTTCAATGAGATGGGTTTATGA  
ACAAGGTGCTTCCTTGGTTGTTAAGTCCTTTAGTGAAG  
AAAGATTAAGAGAAAACCTTGAACATCTTCGACTGGCAAT  
TGACCAAAGAAGATAACGAAAAGATCGGTGAAATCCCA  
CAATGCAGAATTTTGTCTGCTTACTTCTTGGTTAGTCCA  
AAGGGTCCATTCAAGTCTCAAGAAGAATTATGGGATGA  
TAAGGCTTAA  
ATGGAATTGCAATACATCTCCTACTTCCAACCTACCTCT  
TCTGTTGTTGCTTTGTTGTTGGCATTGGTCAGTATCTTG  
TCTCCGTTGTTGTTTTGAGAAAGACCTTCTAAACAAC  
TATTCTTCTTACCAGCTTCTTCTACTAAGACCGCTGTT  
TTGTCTCATCAAAGACAACAATCTTGCGCCTTGCCAATT  
TCTGGTTTGTGCATATTTTCATGAACAAGAACGGTTTG  
ATCCATGTTACCTTGGTAATATGGCTGATAAAGTACGG  
TCCAATTTTCTTTTTCCAACCGTTTCTCATAGAACCTT  
GGTTGTTTCTTCTTGGGAAATGGTCAAAGAATGTTTCAC  
CGGTAACAACGATACCGCCTTTTCTAATAGACCAATTC  
CATTGGCTTTCAAGACCATTTTCTATGCCTGTGGAGGT  
ATCGACTCTTACGGTTTATCTTCTGTTCCATACGGTAAA  
TATTGGAGAGAATTGAGAAAGTTTTGCGTCCACAACCTT  
GTTGTCCAATCAACAATTATTGAAGTTCAGACACTTGAT  
CATCTCCCAAGTTGATACCTCCTTCAACAAGTTATACGA  
ATTGTGCAAGAACTCCGAAGATAATCATGGTAATTACAC  
GACAACAACCACTACAGCTGCAGGTATGGTTAGAATCG  
ATGATTGGTTGGCTGAATTGTCCTTCAACGTTATTGGTA  
GAATCGTTTGGGTTTCCAATCTGGTCCAAAACCTGGT  
GCTCCATCTAGAGTCGAACAATTCAAAGAAGCTATTAA  
CGAAGCCTCCTACTTTCATGTCTACTTCTCCAGTTTCTGA  
TAACGTTCCAATGTTGGGTTGGATCGATCAATTGACTG  
GTTTACTAGAAACATGAAGCATTGTGGTAAGAAGTTG  
GATTTGGTTGTGCAATCCATCATCAACGATCACAGACA

pCS3302 *yPsDRS-DRR*  
(Pso.2062398)

AAAGAGAAGATTCTCCAGAACAAAAGGTGGTGACGAAA  
AGGATGATGAACAAGATGATTTTCATCGACATCTGCTTG  
TCCATTATGGAACAACCACAATTGCCAGGTAACAACAA  
TCCATCACAAATCCCAATCAAGTCCATCGTTTTGGATAT  
GATTGGTGGAGGTAAGTACTGATACCACTAAGTTGACTACAA  
TTTGGACCTTGTCTTGTGTTGAACAACCCACATGTTT  
TGGATAAGGCCAAACAAGAAGTTGACGCTCATTTTAGG  
ACTAAGAGAAGATCTACCAACGACGCTGCAGCCGCCG  
TTGTTGATTTTCGATGATATTCGTAAGTTGGTCTACATCC  
AAGCCATTATCAAAGAATCCATGAGATTATACCCAGCTT  
CCCCAGTTGTTGAAAAGATTGTCAGGTGAAGATTGTGT  
GTTGGTGGTTTTTCATGTTCCAGCTGGTACTAGATTGTG  
GGCTAATGTTTGGAAAATGCAAAGAGATCCAAAGGTTT  
GGGATGACCCTTTGGTTTTTAGACCAGATAGATTCTTGT  
CCGACGAACAAAATGGTTGATGTTAGAGGTCAAAAT  
TACGAATTATTGCCATTTGGTGCCGGTAGAAGAGTTTTG  
TCCAGGTGTTTTCTTCTCCTTGGATTTGATGCAATTGGT  
CTTGACCAGATTGATCTTGAATTGCAATGAAGTCTC  
CATCCGGTAAGGTTGATATGACTGCTACTCCAGGTTTG  
ATGTCTTACAAAGTTATTCCATTGGACATCTTGTGACC  
CATAGAAGAATCAAGCCTTGCCTTCAATCTGCCGCTTC  
TGAAAGAGATATGGAATCTTCTGGTGTCCAGTTATCAC  
TTTGGGTTCTGGTAAAGTTATGCCAGTTTTGGGTATGG  
GTAATTTTGA AAAAGTCGGTAAGGGTCCGAAAGAGAA  
AGATTGGCTATTTTGAAGGCCATCGAAGTTGGTTACAG  
ATACTTTGATACTGCTGCTGCTTACGAAACCGAAGAAG  
TTTTAGGTGAAGCTATTGCTGAAGCCTTGAATTGGGT  
TTAGTAAAGTCAAGAGATGAATTATCATTTCCTCCATG  
TTGTGGTGTACTGATGCTCATGCTGATAGAGTTTTGTTG  
GCATTGCAAACTCATTGAGAACTTGAAGTTGGAATA  
CGTCGACTTGTACATGTTGCCATTTCCAGCTTCATTGAA  
GCCAGGTAAGATTACCATGGATATCCAGAAGAAGATA  
TCTGCAGAATGGATTATAGATCTGTTTGGGCAGCTATG  
GAAGAATGCCAAAATTTGGGTTTCCCAAGTCCATTGG  
TGTCTCTAATTTCTCCTGCAAAAAGTTGCAAGAATTGAT  
GGCTACTGCTAACATTCCACCAGCTGTAAATCAAGTTG  
AAATGTCTCCAGCTTTCCAACAAAAGAAGTTGAGAGAA  
TACTGCAACGCTAACAAACATTTTGGTTTTCCGCCATTTCT  
GTTTTGGGTTCTAATGGTACTCCATGGGTTCAAATGC  
TGTTTTAGGTTCTGAAGTCTTGA AAAAGATTGATGGC  
CAAGGGTAAATCCGTTGCTCAAGTTTCAATGAGATGGG  
TTTATGAACAAGGTGCTTCTTGGTTGTTAAGTCTTTA  
GTGAAGAAAGATTAAGAGAAACTTGAACATCTTCGAC  
TGGGAATTGACCAAAGAAGATCATGAAAAGATCGGTGA  
AATCCCACAATGCAGAATTTTGTCTGCTTACTTCTTGGT  
TAGTCCAAACGGTCCATTCAAGTCTCAAGAAGAATTAT  
GGGATGATGAAGCTTAA

pCS3304 *yPbDRS-DRR (Pbr.12180)*

ATGGAATTGCAATACTTCTCCTACTTCCAACCTACCTCT  
TCTGTTGTTGCTTTGTTGTTGGCATTGGTCAGTATCTTG  
TTTTCCGTTGTTGTTTTGAGAAAGACCTTCTCCAACAAC  
TATTCTTCTCCAGCTTCTTCTACTGAAACCGCTGTTTTG  
TGTCATCAAAGACAACAATCTTGCGCCTTGCCAATTTCT  
GGTTTGTTCATGTTTTTCATGAACAAGAACGGTTTGATC  
CATGTTACCTTGGGTAATATGGCTGATAAGTACGGTCC  
AATTTTCTCTTTTCCAACCGTTTCTCATAGAACCTTGGT  
TGTTTCTTCTTGGGAAATGGTCAAAGAATGTTTCACCG

GTAACAACGATACCTTCTTCAGCAACAGACCCATACCA  
TTAGCCTTTAAGATCATTTTCTACGCCGGTGGTGTAGAT  
AGCTATGGACTTGCTTTAGTGCCATATGGCAAGTACTG  
GAGGGAGTTGAGAAAAATTTGTGTTCAACTTACTTTT  
AAACCAGCAACTTTTGAACCTTAGGCACTTAATAATTC  
TCAAGTCGATACTTCTTTCAATAAGCTGTATGATTTGTC  
AAACAAAAGAAAAATACAACCACTGACTCTGGGACCG  
TTAGGATGGATGATTGGCTAGCTCAATTGTCCTTTAAC  
GTCATTGGAAGGATTGTATGTGGTTTTCAAACACATAC  
GGAACCTCCGCCACGTCAAGTGTGGAACGTTTTACA  
GAAGCAATTGATGAAGCATCAAGATTCATGTCAATTGCT  
ACGGTCTCTGATACTTTCCATGGTTGGGTTGGATAGA  
TCAATTAACAGGTCTTACCCGTAAGATGAAACATTATGG  
TAAGAAGTTAGATTTGGTTGTTGAGAGCATTATCGAAG  
TCACAGGCAAAATAGAAGAATTTCCGGCACCAACAAG  
GAGACGATTTTATTGATATATGTCTGTCTATCATGGAG  
AACCTCAAATAATTCCAGGAAATAACGATCCTCCGAGG  
CAAATACCAATAAAATCTATTGTTTTAGATATGATAGGT  
GGAGGTACCGATACTACTAAATTGACTACAACCTGGAC  
ATTAAGCTTATTACTGAACAATCCACATGTTTTAGAAAA  
AGCCAGAGAAGAAGTAGATGCTCATTTCGGTACAAAGA  
GGCGTCCAACCTAACGATGACGCAGTCATGGTGGAGTTT  
GATGATATACGTAATCTAGTGTATATTCAAGCTATTATT  
AAAGAGTCTATGAGACTTTACCCAGCATCACCAGTAGT  
CGAGCGTTTATCTGGTGAAGACTGTGTAGTTGGCGGTT  
TCCATGTTCCAGCTGGTACTAGATTATGGGTTAATGTCT  
GGAAGATGCAGAGAGATCCGAATGTTTGGGCTGACCC  
GATGGTTTTTAGACCTGAAAGATTCTTGTCTGACGAGC  
AGAAGATGGTGCAGCTTAGAGGACAAAATTATGAATTG  
TTGCCTTCGGTGCAGGTAGGAGAATATGTCTGGTGT  
TTCTTTCTCCTTGGATTTGATGCAATTGGTCTTGACCAG  
ATTGATCTTGGAATTCGAAATGAAGTCTCCATCCGGTAA  
GGTTGATATGACTGCTACTCCAGGTTTGTGTCTTACAA  
AGTTGTTCCATTGGACATCTTGTGACCCATAGAAGAAT  
CAAGTCTTGC GTTCAATTGGCCTCTTCTGAAAGAGATAT  
GGAATCTTCTGGTGTCCAGTTATCACTTTGAGATCTG  
GTAAGTTATGCCAGTTTTGGGTATGGGTACTTTTTGAAA  
AAGCTGGTAAGGTTCCGAAAGAGAAAGATTGGCTATT  
TTGAAGGCCATCGAAGTTGGTTACAGATACTTTGATACT  
GCTGCTGCTTACGAAACCGAAGAAGTTTTAGGTGAAGC  
TATTGCTGAAGCCTTGCAATTGGGTTAATCAAGTCAAG  
AGATGAATTATTCATTTCTCCATGTTGTGGTGTACTGA  
TGCTCATCCAGATAGAGTTTTGTTGGCATTGCAAAACTC  
ATTGAGAACTTGAAGTTGGAATACGTCGACTTGTACAT  
GTTGCCATTTCCAGCTTCATTGAAGCCAGGTAAGATTA  
CCATGGATATCCCAGAAGAAGATATCTGCCCAATGGAT  
TATAGATCTGTTTGGTCTGCTATGGAAGAATGCCAAAAT  
TTGGGTTTGACCAAGTCCATTGGTGTCTCTAATTTCTCC  
TGCAAAAAGTTGGAAGAATTGATGGCTACTGCTAACAT  
TCCACCAGCTGTAAATCAAGTTGAAATGTCTCCAGCTTT  
CCAACAAAAGAAGTTGAGAGAATACTGCAACGCTAACA  
ACATTTTGGTTTCCGCCGTTTCTATTTTGGGTTCTAATG  
GTA CTCCATGGGTTCAAATGCTGTTTTAGGTTCTGAA  
GTCTTGAAAAGATTGCTATGGCCAAGGGTAAATCCGT  
TGCTCAAGTTTCAATGAGATGGGTTTATGAACAAGGTG  
CTTCCTTGGTTGTTAAGTCCTTTAGTGAAGAAAGATTA

GAGAAAACCTTGAACATCTTCGACTGGCAATTGACCAA  
GAAGATAACGAAAAGATCGGTGAAATCCCACAATGCAG  
AATTTTGTCTGCTTACTTCTTGGTTAGTCCAAAGGGTCC  
ATTCAAGTCTCAAGAAGAATTATGGGATGATAAGGCTTA  
A

--- *yPbDRS-DRR (Pbr.4328)*

ATGGAATTGCAATACTTCTCCTACTTCCAACCTACCTCT  
TCTGTTGTTGCTTTGTTGTTGGCATTGGTCAGTATCTTG  
TTTTCCGTTGTTGTTTTGAGAAAGACCTTCTCCAACAAC  
TATTCTTCTCCAGCTTCTTCTACTGAAACCGCTGTTTTG  
TGCATCAAAGACAACAATCTTGCGCCTTGCCAATTTCT  
GGTTTGTTCATGTTTTCATGAACAAGAACGGTTTGATC  
CATGTTACCTTGGGTAATATGGCTGATAAGTACGGTCC  
AATTTTCTCTTTTCCAACCGGTTCTCATAGAACCTTGGT  
GTTTTCTTCTGGGAAATGGTCAAAGAATGTTTCACCG  
GTAACAACGATACCTTCTTTAGTAACAGACCAATTCCAT  
TGGCCTTCAAGATTATTTCTATGCCGGTGGTGTGACT  
CTTATGGTTTGGCTTTGGTTCCATACGGTAAATATTGGA  
GAGAATTGAGAAAGATCTGCGTCCACAACCTGTTGTCC  
AATCAACAATTATTGAAGTTCAGACACTTGATCATCTCC  
CAAGTTGATACCTCCTTCAACAAGTTATACGAATTGTGC  
AAGAACTCCGAAGATAATCAAGGTATGGTTAGAATGGA  
TGATTGGTTGGCTCAATTGTCCTTCTCAGTTATTGGTAG  
AATCGTTTGCAGTTTCCAATCTGATCCAAAACCTGGTG  
CTCCATCTAGAGTCGAACAATTCAAAGAAGCTATTAAC  
GAAGCCTCCTACTTCATGTCTACTTCTCCAGTTTCTGAT  
AACGTTCCAATGTTGGGTTGGATCGATCAATTGACTGG  
TTTGACTAGAAACATGACCCATTGTGGTAAGAAGTTGG  
ATTTGGTTGTGCAATCCATCATCAACGATCACAGACAAA  
AGAGAAGATTCTCCAGAACAAAAGGTGGTGACGAAAAG  
GATGATGAACAAGATGATTTTCATCGACATCTGCTTGC  
CATTATGGAACAACCACAATTGCCAGGTAACAACAATC  
CACCAAAAATCCCAATCAAGTCCATCGTTTTGGATATGA  
TTGGTGGTGGTACTGATACCACTAAGTTGACTACTATTT  
GGACCTTGTCTTGTGTTGAACAACCCACATGTTTTG  
GACAAGGCTAAACAAGAAGTTGACGCTCATTTCTTGAC  
CAAGAGAAGAAGTACAAACGACGCTGCTGTTGTTGATT  
TCGATGACATTAGAACTTGGTCTACATCCAAGCCATTA  
TCAAAGAATCCATGAGATTATACCCAGCCTCTCCAGTT  
GTTGAAAGATTGTCTGGTGAAGATTGTGTTGTTGGTGG  
TTTTCATGTTCCAGCTGGTACTAGATTGTGGGTTAATGT  
TTGGAAGATGCAAAGAGATCCTAACGTTTGGGCTGATC  
CAATGGTTTTAGACCAGAAAGATTCTTGTTCCACGGT  
CAAAAAAAGATGGTTGATGTTAGAGGTAAGAACTACGA  
ATTATTGCCATTTGGTGCCGGTAGAAGAATTTGTCCAG  
GTATTTCTTCTCCTTGGATTTGATGCAATTGGTCTTGA  
CCAGATTGATCTTGAATTCGAAATGAAGTCTCCATCC  
GGTAAGGTTGATATGACTGCTACTCCAGTTTTGATGTC  
TTACAAAGTTGTTCCATTGGACATCTTGTGACCCATAG  
AAGAATCAAGTCTTGCCTTCAATTGGCCTCTTCTGAAA  
GAGATATGGAATCTTCTGGTGTCCAGTTATCACTTTGA  
GATCTGGTAAAGTTATGCCAGTTTTGGGTATGGGTA  
TTGAAAAAGCTGGTAAGGGTCCGAAAGAGAAAGATT  
GGCTATTTTGAAGGCCATCGAAGTTGGTTACAGATACT  
TTGATACTGCTGCTGCTTACGAAACCGAAGAAGTTTA  
GGTGAAGCTATTGCTGAAGCCTTGAATTGGGTTTAAT  
CAAGTCAAGAGATGAATTATTCATTTCTCCATGTTGTG

GTGTA CTGATGCTCATCCAGATAGAGTTTTGTTGGCATT  
GCAAAACTCATTGAGAACTTGAAGTTGGAATACGTCG  
ACTTGTACATGTTGCCATTTCCAGCTTCATTGAAGCCAG  
GTAAGATTACCATGGATATCCCAGAAGAAGATATCTGC  
CCAATGGATTATAGATCTGTTTGGTCTGCTATGGAAGA  
ATGCCAAAATTTGGGTTTGACCAAGTCCATTGGTGTCT  
CTAATTTCTCCTGCAAAAAGTTGGAAGAATTGATGGCTA  
CTGCTAACATTCCACCAGCTGTAAATCAAGTTGAAATGT  
CTCCAGCTTTCCAACAAAAGAAGTTGAGAGAATACTGC  
AACGCTAACAAACATTTTGGTTTCCGCCGTTTCTATTTTG  
GGTTCTAATGGTACTCCATGGGGTTCAAATGCTGTTTTA  
GGTTCTGAAGTCTTGAAAAGATTGCTATGGCCAAGGG  
TAAATCCGTTGCTCAAGTTTCAATGAGATGGGTTTATGA  
ACAAGGTGCTTCCTTGGTTGTTAAGTCCTTTAGTGAAG  
AAAGATTAAGAGAAAACCTTGAACATCTTCGACTGGCAAT  
TGACCAAAGAAGATAACGAAAAGATCGGTGAAATCCCA  
CAATGCAGAATTTTGTCTGCTTACTTCTTGGTTAGTCCA  
AAGGGTCCATTCAAGTCTCAAGAAGAATTATGGGATGA  
TAAGGCTTAA

pCS3347 *yPbSalAT-1*

ATGGCTACCATGTATTCCGCTGCCGTTGAAGTTATTTCT  
AAAGAACTATTAAGCCAACCACCCCAACTCCATCTCA  
ATTGAAGAATTTCAACTTGCCTTGTGGACCAATGCTT  
CCCATTGTATTATTACGTCCCAATCATCTTGTCTACCC  
AGATACTGTTGCTAACTCTACTGGTTCTTCTCCCATCA  
TGATGATTTGGACTTGTGAAGTCCTCCTTGTCTAAAAC  
TTTGGTTCACCTGTATCCAATGGCCGGTAGAATGATTG  
ATAACATCTTGGTTGATTGCCACGATCAAGGTATTGATT  
TCTACAAGGTTAAGATCAGAGGTAAGATGTGCGACTTT  
ATGTCTCAACCAGATGTTCCATTGTCCCAATTATTGCCA  
TCTGAAGTTGTTTCTGCCAACGTTCCAAAAGAAGCCTT  
GGTTATCGTTCAAGTTAACATGTTTGATTGCGGTGGTA  
CTGCCATTTGTTCTTCCATTTCTCATAAGATCTCTGATG  
TTGCTACCATGGGTACTTTTATTAGATCTTGGGCTTCTA  
CTACTAAGACCTCTAGATCTGGTGATGCTACTGCTGCT  
GTTATTACTGATCAAAAGTTGATCCCTTCTTCCGATTCT  
GCTTCTTTGTTTCCACCATCTGAAAGATTGGCTTCTCCA  
TCTGGTATGGCTGAAATTCATTTTCTCAATCCCTGAA  
GATACCGAAGATGATAAGACCGTTTCTAAGAGATTCTG  
TTTCGATTTTCGCCAAGATCACCTCTGTTTCTGAAAAGTT  
GCAAGTTTGTATGCACGACAACACTACAAGTCTCGTAGAC  
CAACTAGAGTTGAAGTTGTCACCTCTTTGATTTGGAAGT  
CCGTTATGAAGTCTACTCCAGCTGGTTTTTTGCCAGTT  
GTTGATCATGCTGTTAACTTGAGAAAAGAAGATGGATCC  
ACCATTGCAAGATGCTTCATTTGGTAACTTGTCTGTTAC  
CGTTTCTGCTTTTTTGGCAGCTACTACTACTACCACTAC  
TAATGCTGTTAACAAGACTATCAACTCCACCTCCTCTGA  
ATCCCAAGTTGTTTTACATGAATTGCACGACTTCATTGC  
CCAATTGAGATCCGAAATTGATAAGGTTAAGGGTGACA  
AGGGTTCCTTGGAAAAGGTTATTCAAACTTCGTTTCC  
GGTTACGATGCCTCCATTAAGAAAATCAACGATGTCGA  
AGATAAGGTTATCAACTTCTGGATTTCTTCATGGTGCAG  
AATGGGTTTGTACGAAATTGATTTTGGTTGGGGTAAGC  
CAATCTGGGTTACTATTGATCCAAACATCAAGCCAAACA  
AGAAGTCTTGTATGAACGATACCAAGTGCGGTCAA  
GGTATAGAAGTTTGGGCTTCATTTTTGGAAGATGACAT  
GGCTAAGTTTGAATTGCACTTGTCCGAAATCTTGGAAAT



pCS3348 *yPbSalAT-2*

GATTTGA  
ATGGCTACCATGTATTCCGCTGCCGTTGAAGTTATTTCT  
AAAGAAACCATTAAGCCAAAGACCCCAACCTTGTACCA  
TTTCAAGATTTTCAACTTGTCTTGTGGACCAATATTA  
CCCACCATTCTACATTCCAACCATCTTGTTTTATCCAGC  
TACCGTTGCTAACAACACCGTTTCTTCTAACCATCACGA  
TGATTTGGACTTGTTGAAGAACTCCTTGTCCGAAACTTT  
GGTTCATTTTTATCCAATGGCCGGTAGAATGAAGGATA  
ACATAGTTGTTGATTGCAACGACCAAGGTATCGACTTTT  
ACCAAGTTAAGATCAAGTGCAAGATGTACGACTTCATG  
ACTCAAACCTGATGTCCCATTGTCTCAATTATTGCCATCC  
GAAGTTGTTTCTGCTTGCCTTGCTAAAGAAGCTCAAGT  
TATCGTTCAAGTCAACATGTTTGATTGCTGCGGTACTG  
CTATTTCCGTTTCCATTTCTCATAAGATTGCTGATGCTG  
CTACTATGTCCACCTTTATTAGATCTTGGGCTTCTAACA  
CTAAGACCTCTAGATCTGGTGGTGCTATTGCTGATGCA  
GTTACTACTAATCAAAGTTGTTGCCTTGCTTCGATTCC  
GCTTCTTTGTTTCCACCATCTGAACAATTGGCTTCTCCA  
GCTGGTATGCCAGTTCCACCAATTCCAGTTTCTTGATT  
TTGGATGATACCGTTGATGACAAGACCGTCAGTAAGAG  
ATTTGTTTTCGATTTGGTCAAGATCACCTCCGTCAGAGA  
AAAGATTCAAGAATTGATGCACGACAACCTACAAGTGTA  
GAAGGCCAACTAGAGTTGAAGTTGTCACCTCTTTGATT  
TGGATGTCCGTTATGAAGTCTACTTTGGCTGGTTTTTTG  
CCAGTTGTTAACCATGCTGTTAACTTGAGAAAGAAGAT  
GTACCCACCATTGCAAGATGTTTCTTTCCGTAACCTTGT  
TTTGTCTGTTACTGCTTTGTTGCCAGCTACTACTACTAT  
GAAAACCTACCATTAACGAAGCCAACAAGACCATTAACCT  
CTACCTCTAACGAAGTTCAATTGTTGTTGCACGAATTGC  
ACGATTTGATCACCCAATTGAGATCCGCTATTGATGAA  
GTTAAGGGTGATAAGGGTTGCATGGAAAAGTTGATCCA  
ACATTTTCGTTTCCGGTTACGAATACGCTTCTACTGAAAG  
AAAGAACGACGTCGAATACGAAATGATTACCTTGTGTA  
TGACCTCTTGGTGTAGAATGGGTTTCTACGAAACTGAT  
TTTGGTTGGGGTAAACCAGTTTGGGTTACTACTGATCC  
AAATATCAAGCCAAACAAGAAGTTGATCTTCATGAACGA  
TACCAGATGCGGTGAAGGTATTGAAGTTTGGGTTTGT  
TCTTGGAAGATGACATGGCTAAGTTTGAATTGCACCTGT  
CCGAAATCTTGGAAATTGATTTGA

pCS3349 *yPoSalAT*

ATGGCTACCATGTATTCCGCTGCCGTTGAAGTTATTTCT  
AAAGAAACCATTAAGCCAAAGACCCCAACCTTGTACCA  
TTTCAAGAATTTCAACTTGTCTTGTGGACCAATATTA  
CCCACCATTCTACATTCCAACCATCTTGTTTTATCCAGC  
TACCGTTGCTAACAACACCGTTTCTTCTAACCATCACGA  
TGATTTGGACTTGTTGAAGTCTCTTTGTCCGAAACTTT  
GGTTCATTTTTATCCAATGGCCGGTAGAATGAAGGATA  
ACATAGTTGTTGATTGCAACGACCAAGGTATCGACTTTT  
ACCAAGTTAAGATCAAGTGCAAGATGTGCGATTTTCATG  
ACTCAAACCTGATGTCCCATTGTCCAATTATTGCCATCT  
GAAGTTGTTTCTGCTTGCCTTGCTAAAGAAGCTCAAGT  
TGTGTTCAAGTCAACATGTTTGATTGCTGCGGTACTG  
CTATTTCCGTTTCCATTTCTCATAAGATTGCTGATGCTG  
CTACTATGTCCACCTTTATTAGATCTTGGGCTTCTAACA  
CTAAGACCTCTAGATCTGGTGGTGCTATTGCTGATGCA  
GTTACTACTAATCAAAGTTCTTCCCTTGCTTCGATTCC  
GCTTCTTTGTTTCCACCATCTGAACAATTGCCATCTCCA

pCS3350 *yPsAT1*

GCTGGTATGCCAGTTCACCAATTCCAGTTTCTTGTATT  
TTGGATGATACCGTTGATGACAAGACCGTCAGTAAGAG  
ATTTGTTTTCGATTTGGTCAAGATCACCTCCGTCAGAGA  
AAAGATTCAAGAATTGATGCACGACAACACTACAAGTGTA  
GAAGGCCAACTAGAGTTGAAGTTGTCACCTCTTTGATT  
TGGATGTCGGTTATGAAGTCTACTTTGGCTGGTTTTTGT  
CCAGTTGTTAACCATGCTGTTAACTTGAGAAAGAAGAT  
GTACCCACCATTGCAAGATGTTTCTTTCCGGTAACTTGT  
TTTGTCTGTTACTGCTTTGTTGCCAGCTACTACTACTAT  
GAAAACACCATTAACGAAGCCAACAAGACCATTAAC  
CTACCTCTAACGAAGTTCAATTGTTGTTGCACGAATTGC  
ACGATTTGATCACCAATTGAGATCCGCTATTGATGAA  
GTTAAGGGTGATAAGGGTTGCTTGGAAAAGTTGATCCA  
ACATTTTCGTTTCCGGTTACGAATACGCTTCTACTGAAAG  
AAAGAACGACGTCGAATACGAAATGATTACCTTGTGTA  
TGACCTCTGGGTGTAGAATGGGTTTCTACGAAACTGAT  
TTTGGTTGGGGTAAACCAGTTTGGGTTACTACTGATCC  
AAATATCAAGCCAAACAAGAAGTTTCACTTTCATGAACGA  
TACCAGATGCGGTGAAGGTATTGAAGTTTGGGCTTGTT  
TTTTGGAAGATGACATGGCTAAGTTTGAATTGCACCTTGT  
CCGAAATCTTGGAAATTGATTTGA  
ATGGCTACCATGTCATCTGCTGCCGTTGAAGTTATTTCT  
AAAGAAACCATCAAGCCAAGAAACCCAACCTCCATATCA  
ATTGAGAAACTACAACATGTCCTTGTGGACCAATACTC  
CTCTTTGGTTTACGTTCCAATCATCTTGTTTTACCCAGC  
TGCTTCTGATGCTAATTCCACTGGTTCTAAACATCATGA  
TGACTTGCACCTTGTGAAGAGATCCTTGTCTGAAACTTT  
GGTTCACTTTTATCCAATGGCCGGTAGAATGAAGGATA  
ACATGACTGTTGATTGCAACGATGAAGGTATCGACTTC  
TTTGAAGTTAGAATCAAGGGTAGAATGTGCGACTTCAT  
GATGAAGAGTGATGCTCATTTGTCTTTGTTGTTGCCATC  
TGAAGTTGCTTCTACCAACTTTGTCAAAGAAGCCCAAG  
TTATCGTTCAAGTCAACATGTTTGATTGTGGTGGTACTG  
CTATTTGCTTCTGCATTTCTAACAAGATTGCTGATGCTT  
GCACCATGATTACCTTCATTAGATCTTTGGCTGGTACTA  
CCAACATTGCTAGAAGAGGTTCTTCTATTGCTGCTCCA  
ACTACCAATCAAATTTGGTTCTTCTTTTCGACTCCACC  
TCTTTGTTTCCACCATCTGAACAATTGGCTTCCCAAGTT  
TCTTATCCAACCTCAAGATTCTACCTCCGTTGACAAGTTG  
GTTTCTAAGAGATTTGTTTTCGATGCCGCCAAGATTACT  
TCTGCTAGAGAAAAATTGCAATCCTTGATGCACGATAA  
GTACAAGTGTCATAGACCAACCAGAGTTGAAGTTGTTT  
CTGCTTTGATTTGGAAGTCCGCTGTTAAGTCTGCTCCA  
CCAGGTTCTATTTCTACTGTTACTCATGCTATGAACTTC  
AGAAAGAAGATGGATCCACCATTGCAAGATGCTTCATT  
TGGTAACCTGTGTGTTGTTGTTACTGCTGTTTTGCCAGC  
TACTACTGCTACTACAACCTAATCCAGCTACTAAGAAGGT  
TTCCTCTACCTCTAATGAAGAACAAGTTGCCTTGGATGA  
ATTGTCCGATTTTGTGCTTTGTTGAGAAGAGAAATCGA  
CAAGGTTAAGGGTGATAAGGGTTGCATGGAAAAGATCA  
TCCAAAAGTTCATCTACGGTCATGATGCCTCTGTTGCTA  
AAGATTCTGATGTTGAAGATAAGGTTACCGCCTTGTGTTA  
TGACTTCTGGTGTAAGTTTGGTTTCTACGAAGCTGATT  
TTGGTTGGGGTACTCCAGTTTGGGTTACTACTGTTCCA  
TTGATTGAACCTAAGTACAAGAACATGGTTTTTCATGAAC  
GATATGAAGTGCGGTGAAGGTATTGAAGTTTGGGTTAA

---

CTTCTTGGAAGATGACATGACCAAGTTTGAACACCACT  
TGAGAGAAATCTTGCAATTATTCTAA

---

## Supplementary Figures

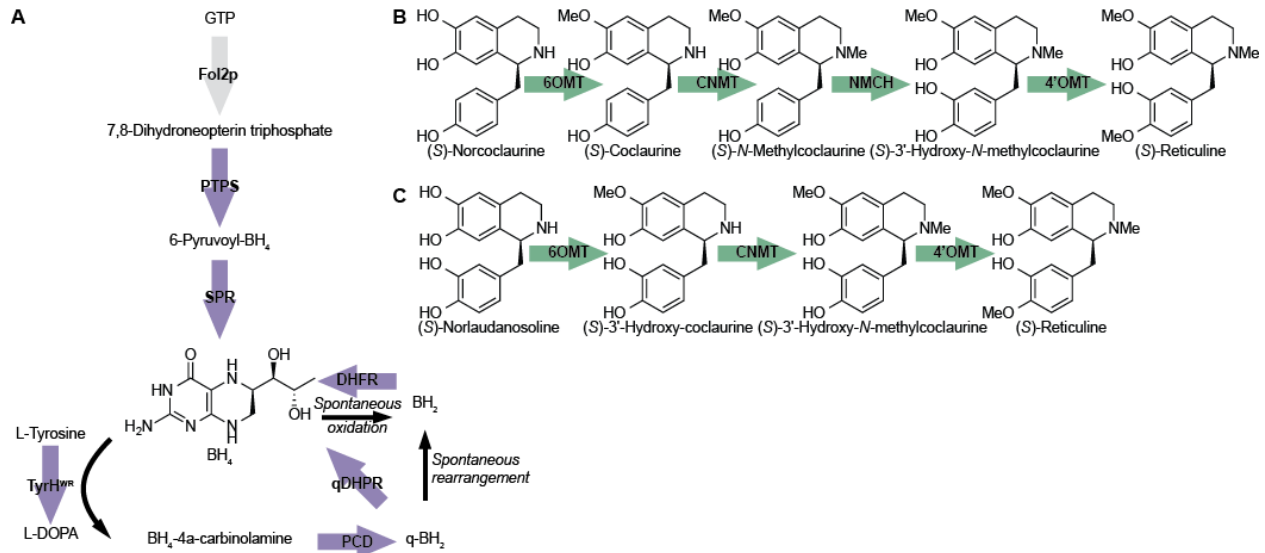

**Figure S1. Biosynthetic scheme for 5,6,7,8-tetrahydrobiopterin (BH<sub>4</sub>) cofactor biosynthesis and recycling and conversion of (S)-norcoclaurine or (S)-norlaudanosoline to (S)-reticuline.**

Schemes for **(A)** BH<sub>4</sub> biosynthesis, recycling, and salvage, **(B)** conversion of (S)-norcoclaurine to (S)-reticuline, and **(C)** conversion of (S)-norlaudanosoline to (S)-reticuline. Block arrows indicate enzyme-catalyzed steps. Light grey arrows, unmodified yeast enzymes; purple arrows, *Rattus norvegicus* enzymes. GTP, guanosine triphosphate; q-BH<sub>2</sub>, quinonoid dihydrobiopterin; BH<sub>2</sub>, 7,8-dihydrobiopterin; Fol2p, GTP-cyclohydrolase I; PTPS, 6-pyruvoyl-BH<sub>4</sub> synthase; SPR, sepiapterin reductase; PCD, pterin-4a-carbinolamine dehydratase; qDHPR, q-BH<sub>2</sub> reductase; DHFR, dihydrofolate reductase; 6OMT, norcoclaurine 6-*O*-methyltransferase; CNMT, coclaurine *N*-methyltransferase; NMCH, *N*-methylcoclaurine hydroxylase; 4'OMT, 3'-hydroxy-*N*-methylcoclaurine 4'-*O*-methyltransferase.

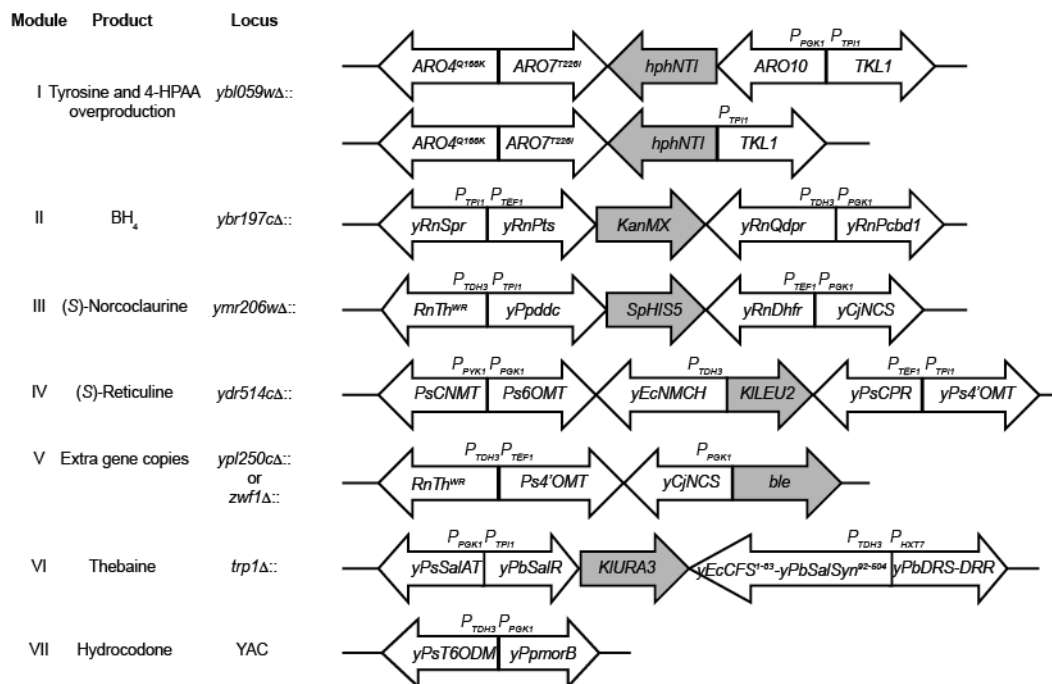

**Figure S2. Genetic design of pathway modules for yeast strain construction.**

Modules are designed to integrate into one of six chromosomal loci in the yeast genome or for yeast artificial chromosome-based (YAC) expression. White block arrows indicate gene expression cassettes with a promoter, coding sequence, and terminator. Grey block arrows, loxP-flanked selection markers. For non-yeast enzymes, codon-optimization is indicated by a leading “y”, and the source genus and species is designated by the two letters immediately preceding the gene symbol. See tables S1, S3, S7, and S8 for expression cassette, strain number, genome assembly primers, and new synthetic coding sequences.

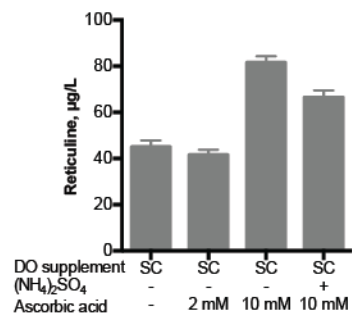

**Figure S3. Optimization of strain cultivation.**

Optimization of ascorbic acid concentration and nitrogen source for reticuline production. Strain CSY1061 was cultivated in minimal media with the indicated modification for 72 h and reticuline in the growth media was quantified by LC-MS/MS MRM with an external standard curve. Error bars represent standard deviation of three biological replicates.

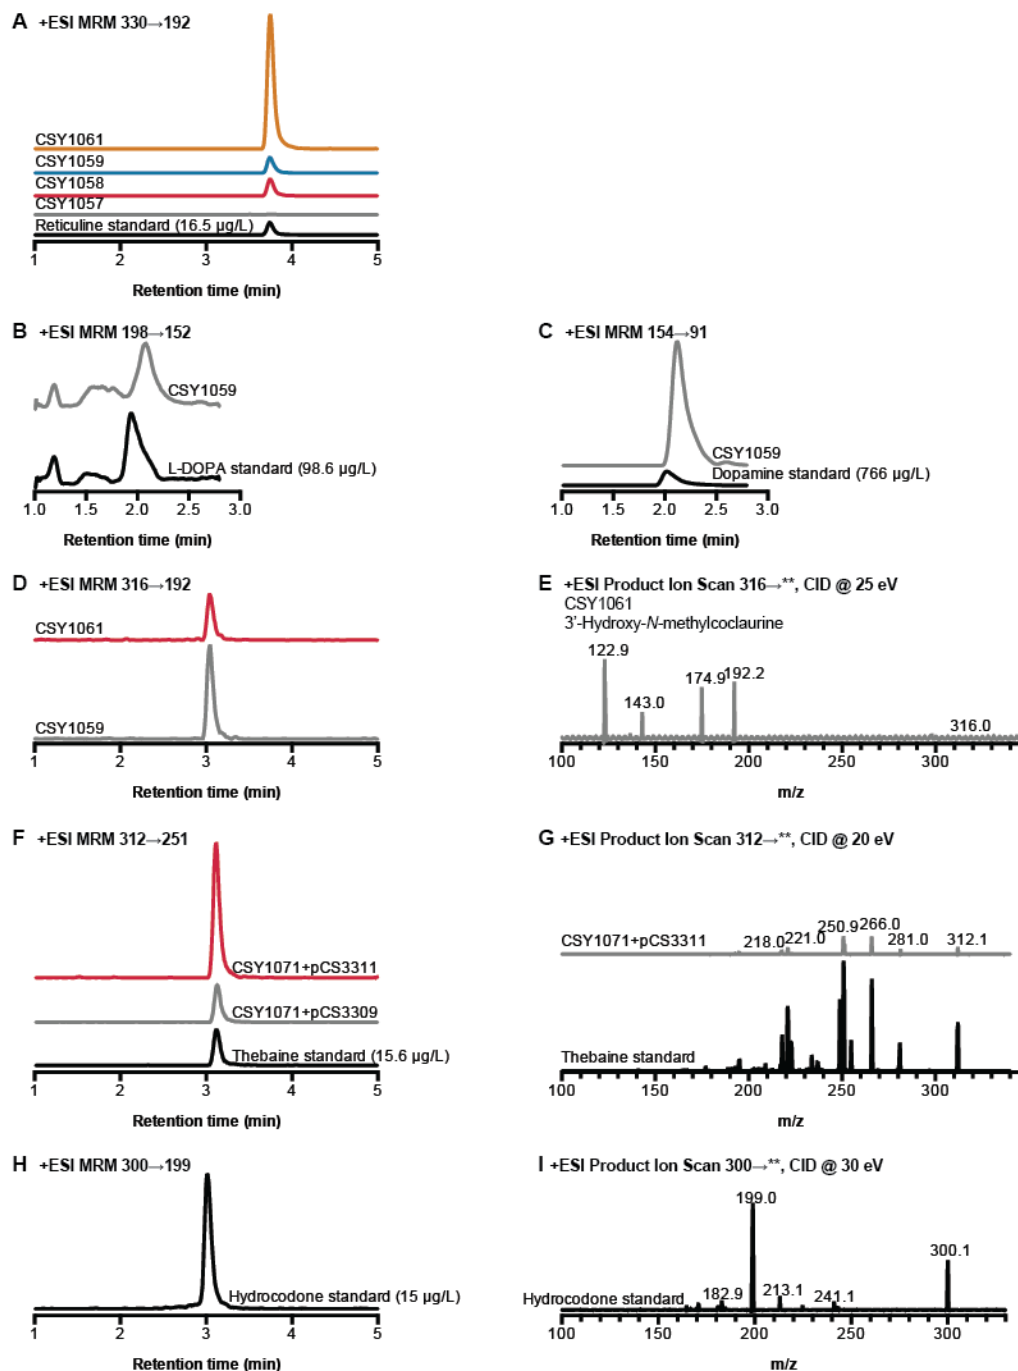

**Figure S4. LC-MS/MS characterization of intermediates and products in yeast growth media.**

Chromatogram traces of **(A)** reticuline, **(B)** L-DOPA, **(C)** dopamine, and **(D)** 3'-hydroxy-*N*-methylcoclaurine in growth media of indicated strains. **(E)** Product ion spectrum (25 ev) of 3'-

hydroxy-*N*-methylcoclaurine is consistent with a published spectrum (57). Chromatogram traces **(F)** and product ion spectra (20 eV, **G**) of thebaine in growth media of CSY1071+pCS3311 and 15.6 µg/L (50 nM) thebaine standard. Chromatogram trace **(H)** and product ion spectra (30 eV, **I**) of 15 µg/L (50 nM) hydrocodone standard. Traces for growth media are representative of at least three biological replicates.



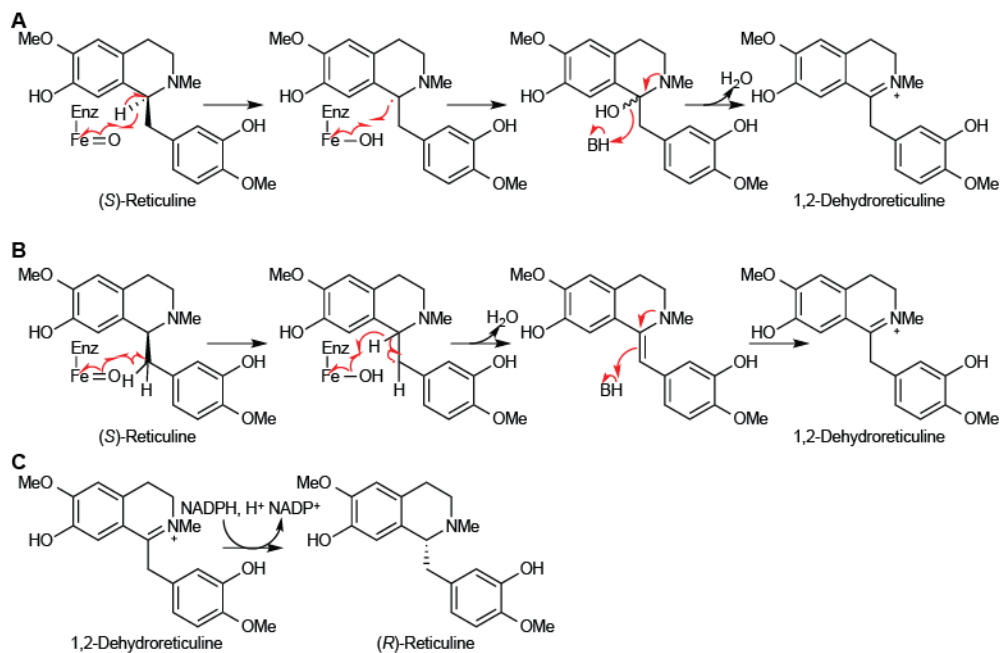

**Figure S5. Mechanistic hypothesis for DRS-DRR activity.**

The oxidation of (*S*)-reticuline to 1,2-dehydroreticuline may occur via **(A)** a carbinolamine or **(B)** an enamine intermediate. **(C)** 1,2-Dehydroreticuline is then stereospecifically reduced to (*R*)-reticuline.

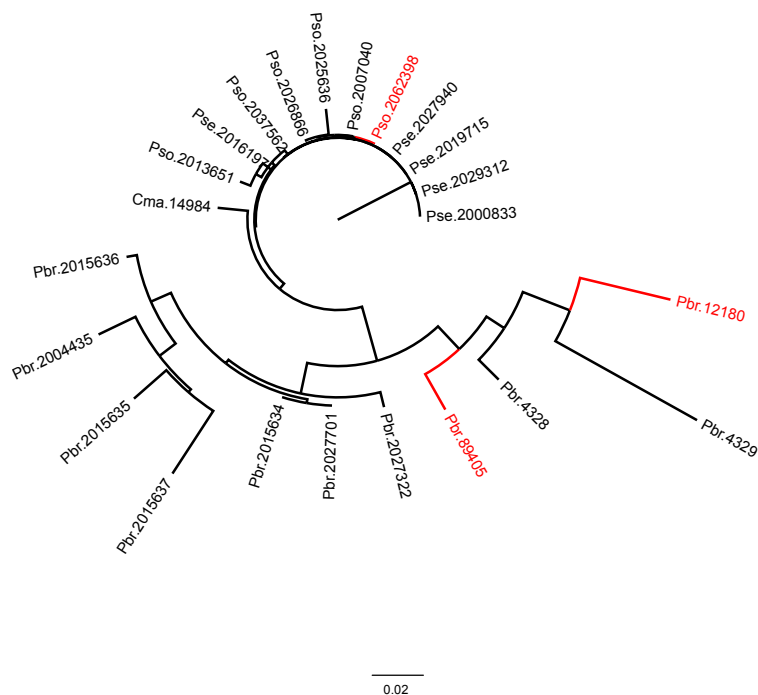

**Figure S6.** Identification of additional DRS-DRR variants via bioinformatic analysis of Pbr.89405-like sequences. Bioinformatic query was Pbr.89405 amino acid sequence and subject sequences were the complete PhytoMetaSyn and 1000 Plants Project transcriptomes. Sequences included in this tree contained both cytochrome P450 and reductase domains. The scale bar indicates amount of genetic change in amino acid substitutions per site. Branches highlighted in red indicate sequences for which data is included in this work. Phylogenetic tree was generated using ClustalX bootstrap NJ tree with 1000 trials and visualized with FigTree.

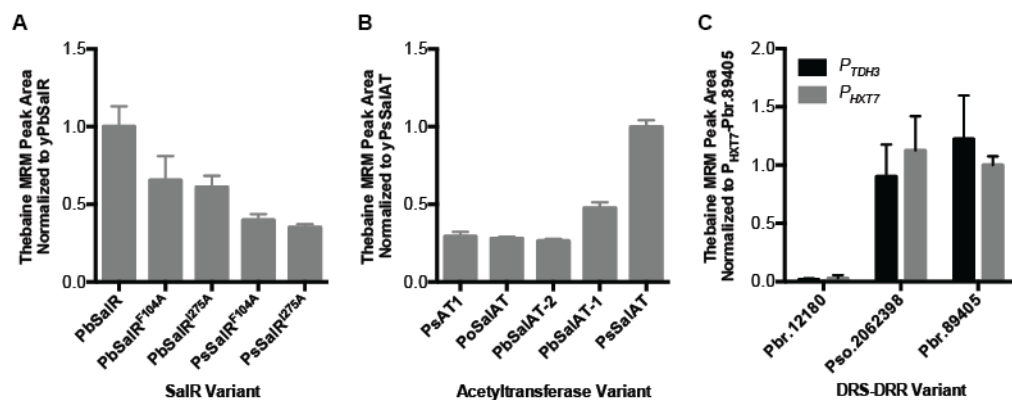

**Figure S7. Characterization of SalR, SalAT, and DRS-DRR variants in the context of the engineered biosynthetic pathway in yeast.**

**(A)** Thebaine production from SalR variants and mutants. **(B)** Thebaine production from SalAT variants and mutants. SalR (pCS3271, 3343-3346) and SalAT (pCS3272, 3347-3350) variants and mutants were expressed from YACs assembled in CSY3. Yeast strains were fed 10  $\mu$ M salutaridine, and the growth media was analyzed for thebaine by LC-MS/MS MRM. **(C)** Comparison of thebaine production from DRS-DRR variants expressed from glycolytic ( $P_{TDH3}$ ) and late-stage ( $P_{HXT7}$ ) promoters. DRS-DRR variants were expressed from low-copy plasmids (pCS3300-3305) in CSY1071. Yeast strains were fed 10  $\mu$ M (*S*)-reticuline, and the growth media was analyzed for thebaine by LC-MS/MS MRM. Error bars represent the standard deviation of three biological replicates.

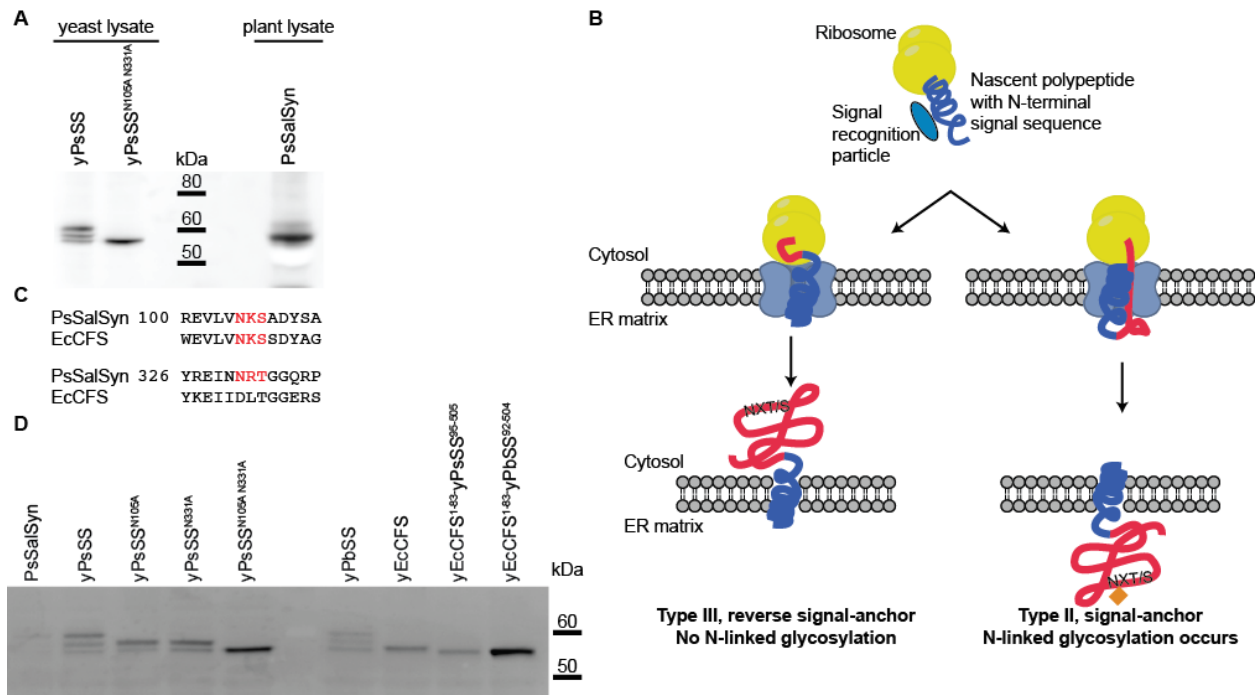

**Figure S8. SalSyn is mis-processed in yeast and N-glycosylated.**

(A) Western blot analysis of the C-terminally HA-tagged SalSyn protein expressed in yeast and plants. In plants the protein runs primarily as a single band and in yeast the protein runs as three bands, indicative of N-linked glycosylation. When mutations are introduced into the protein to remove the N-glycosylated sites (yPsSS<sup>N105A N331A</sup>), the yeast-expressed protein runs as a single band. yPsSS, yeast codon-optimized SalSyn; PsSalSyn, wild-type *P. somniferum* SalSyn. The expected molecular weight of SalSyn was 62.5 kDa. (B) Schematic showing hypothesized correct and mis-processing of the nascent SalSyn peptide when heterologously expressed in yeast. (C) Amino acid sequence alignment from ClustalX of EcCFS (*E. californica* cheilanthifoline synthase) and PsSalSyn in the regions of SalSyn that are N-glycosylated. NXT/S sites indicated in red. (D) Western blot analysis of the engineered SalSyn fusion proteins expressed in yeast. The fusions run as a single band on the gel, indicating that they are processed correctly when heterologously expressed in yeast. yPsSS<sup>N105A</sup>, yPsSS<sup>N331A</sup>, single mutants to remove one of the two glycosylated sites in yeast codon-optimized SalSyn; yPbSS, yeast codon-

optimized *P. bracteatum* salutaridine synthase; yEcCFS, yeast codon-optimized *E. californica* CFS; yEcCFS<sup>1-83</sup>yPsSS<sup>95-505</sup>, yEcCFS<sup>1-83</sup>yPsSS<sup>92-504</sup>, engineered SalSyn fusions. Blots are representative of two biological replicates.
